# Supplementary material for: ATHLATES: accurate typing of human leukocyte antigen through exome sequencing
Source: PubMed Central journal article supplement — Nucleic Acids Res. 2013 Jun 8;41(14):e142. doi: 10.1093/nar/gkt481 (PMC3737559; doi:10.1093/nar/gkt481), 2013-06-08

## Supplementary Algorithm, Tables and Figures

# ATHLATES: Accurate Typing of Human Leukocyte Antigen Through Exome Sequencing

Chang Liu<sup>1,6</sup>, Xiao Yang<sup>2,6</sup>, Brian Duffy<sup>3</sup>, Thalachallour Mohanakumar<sup>1,4</sup>, Robi D. Mitra<sup>4,5</sup> Michael C. Zody<sup>2</sup> & John D. Pfeifer<sup>1</sup>

<sup>1</sup>Department of Pathology and Immunology, Washington University School of Medicine, St. Louis, Missouri, USA. <sup>2</sup>Genome Sequencing and Analysis Program, Broad Institute of MIT & Harvard, Cambridge, Massachusetts, USA. <sup>3</sup>HLA Laboratory, Barnes-Jewish Hospital, St. Louis, Missouri, USA. <sup>4</sup>Department of Surgery, Washington University School of Medicine, St. Louis, Missouri, USA. <sup>5</sup>Center for Genome Sciences and Systems Biology, Washington University School of Medicine, St. Louis, Missouri, USA. <sup>6</sup>These authors contributed equally to this work. Correspondence should be addressed to X.Y. ([xiaoyang@broadinstitute.org](mailto:xiaoyang@broadinstitute.org)) or J.D.P. ([pfeifer@path.wustl.edu](mailto:pfeifer@path.wustl.edu)).

### LIST OF SUPPLEMENTARY ALGORITHMS

**Supplementary Algorithm 1.** Contig generation via Union-Find algorithm.

### LIST OF SUPPLEMENTARY TABLES

**Supplementary Table 1.** Sequences of typed HLA genes included in the reference.

**Supplementary Table 2.** Characteristics of exome-seq data used for *in silico* HLA typing.

**Supplementary Table 3.** HLA typing results using exome-seq data and the laboratory validation.

**Supplementary Table 4.** A sample report generated by ATHLATES. Twenty one alleles were initially identified to be within distance 2. The first 4 alleles have distance 0 and in the meanwhile, they correspond to 2 types of protein coding sequences. According to candidate allele selection criterion, the candidate allele list consists of these 4 alleles, where in total 10 allelic pairs (4 homo- and 6 heterozygous) were resort to scoring function. The pairing between DQB1\*02:01:01 and any one of DQB1\*03:03:02:01, DQB1\*03:03:02:02, and DQB1\*03:03:02:03 gives the equivalent minimum score as compared to the pairing among DQB1\*03:03:02:01, DQB1\*03:03:02:02, and DQB1\*03:03:02:03, where the latter cannot account for all the variants present in the contigs.

**Supplementary Table 5.** Statistical analysis of allelic bias within individual exons.

## LEGENDS FOR SUPPLEMENTARY FIGURES

**Supplementary Figure 1.** Ambiguities resulted when merging paired-end reads ( $r_0$ ,  $r_1$ ). (A)  $r_0$  and  $r_1$  align to allele<sub>0</sub>, where the aligned regions partly overlap. The bases highlighted in red indicate disagreement, which is denoted by a degenerate base S = (11) in the merged read  $r'$ . With  $r_2$  aligning to the same region, base C is selected in the newly merged read  $r''$ . (B)  $r_0$  and  $r_1$  align to both allele<sub>1</sub> and allele<sub>2</sub>. Allele<sub>1</sub> contains an additional base C highlighted in red compared to allele<sub>0</sub>, within the gap between  $r_0$  and  $r_1$ , resulting in two legitimate merging results  $r'$  and  $r''$ .  $r''$  is supported upon the identification of an additional read  $r_2$  that is consistent with  $r''$ .

**Supplementary Figure 2.** Examples of preferring similarity to length when identifying the best match of an exon and the necessity of considering non-zero distance alleles. (A) The alignment of the second exons of the heterogeneous alleles A\*02:01:01:01 and A\*02:11:01 of sample HG01953 and the two contigs  $c_i$  and  $c_j$  identified by ATHLATES is shown. Contig  $c_i$  is identical to exon 2 of A\*02:01:01:01 and contig  $c_j$  is a proper prefix of exon 2 of A\*02:11:01. Because exon 2 of the two alleles differ only by the two bases highlighted,  $c_i$  naturally serves as a candidate hit for exon 2 of A\*02:11:01 that has a length identical to exon 2 and a similarity over 99%. Nevertheless,  $c_j$  is shorter but has a 100% similarity. A\*02:11:01 would have been missed without tolerating missing bases. (B) The alignment of the seventh exons of candidate alleles C\*04:01:01:01 and C\*04:30 and contig  $c_i$  identified by ATHLATES is shown.  $c_i$  is identical to exon 7 of C\*04:01:01:01 and it is the only contig that can serve as a candidate hit for exon 7 of C\*04:30. Without tolerating non-zero distance alleles, C\*04:30 would have been missed.

**Supplementary Figure 3.** Variations in fold coverage among different target HLA genes and their exons. The median fold coverage is plotted for individual exons of each HLA gene. Error bars show 95% confidence intervals. The data are divided into panels by gene and groups by sample. Sample labels are shown below the bottom panel for the last gene.

**Supplementary Figure 4.** Schematic of principles for allelic pair inference. (A) Principle of parsimony. Assuming two contigs, Contig<sub>a</sub> and Contig<sub>b</sub>, have been assembled and two candidate alleles, allele<sub>0</sub> and allele<sub>1</sub>, have been identified. Allele<sub>0</sub> differs from allele<sub>1</sub> by one base, highlighted in red. ATHLATES would check three allelic pairs: (allele<sub>0</sub>, allele<sub>1</sub>), (allele<sub>0</sub>, allele<sub>0</sub>) and (allele<sub>1</sub>, allele<sub>1</sub>). We cannot rule out the possibility of (allele<sub>0</sub>, allele<sub>1</sub>) or (allele<sub>1</sub>, allele<sub>1</sub>) being the correct answer as Contig<sub>b</sub> could have supported allele<sub>1</sub> if the missing bases were TGG. However, the homozygous pair (allele<sub>0</sub>, allele<sub>0</sub>) is preferred as it is based on the fewest assumptions and sufficient to represent both contigs. (B) The allelic pair should capture as much information as presented in the data. Assuming four potential alleles (B\*55:02:01, B\*56:11, B\*35:03:01, B\*35:60) have been identified as candidates for HLA-B of sample

HG01873 and every exon of each allele are present in the contigs. It turns out that these four alleles share a subset of exons. As labeled in the table, for a given exon (1-4), whenever two alleles share the same exon sequence, they are assigned the same label A or B: *e.g.* the second exon between B\*55:02:01 and B\*56:11 are identical, hence, they are assigned the same label A. In allelic pair inference, a total of 10 possible allelic combinations (4 homozygous and 6 heterozygous) of these four alleles are considered. Only the pair B\*55:02:01 and B\*35:03:01 could account for all types of haplotypes of exons supported by data, resulting in heterozygosity (both A and B alleles) at all four exons. This example also illustrates a resolution of the phase of different exons.

**Supplementary Figure 5.** Diversity of the HLA genotypes of included study samples. The genetic diversity of the 15 samples included in this study is visualized by mapping all their alleles onto the phylogenetic trees of each gene typed. The alleles are mapped at the four-digit resolution (same protein sequence corresponding to Sanger sequenced exons) and are highlighted in colors corresponding to each gene. The phylogenetic trees are generated using RAxML (v.7.3.3). The genetic diversity can be appreciated based on the coverage and pattern of colored alleles. The detailed specificity of included alleles can be found in **Supplementary Table 3**.

**Supplementary Figure 6.** An example of exom-seq data of the individual NA18526 (1<sup>st</sup> row) that has inadequate coverage over target HLA genes. The five target HLA genes of this individual were typed previously. ATHLATES reported no typing result for any of the target gene as the assembled contigs did not unambiguously support any candidate allele due to insufficient exon coverage. The alignment is generated using BLAST between contigs of a target gene and one of the known cDNA sequences of this gene. For DQB1 gene, no contig was produced by ATHLATES. HLAmminer, on the other hand, reported typing results for HLA-A, B, C and DRB1 genes, all of which are discordant with the known type except HLA-B, where the known type is among one of the seven equally supported candidates. The other 4 samples with inadequate coverage are NA18605 (2<sup>nd</sup> row), HG01515 (3<sup>rd</sup> row), HG01049 (4<sup>th</sup> row), and HG00731 (5<sup>th</sup> row). The bars at the bottom row show exons of each gene.

**Supplementary Figure 7.** Comparison of HLA typing results between ATHLATES and the conventional Sanger method grouped by genes and samples. The left panel shows the number and type of allelic pairs that are reported by both methods in concordance. In 31 out of 65 typing results one unique allelic pair is reported, while two or more allelic pairs that harbor intronic polymorphisms are reported in the rest by both methods. The right panel demonstrates the number and type allelic pairs ruled out by ATHLATES but are encountered by Sanger method after the first round of sequencing. The causes of these extra allelic pairs include polymorphisms in exons that are not sequenced, polymorphisms at positions not covered by

Sanger sequences, and cis/trans ambiguities (or same diploid sequence shared by two or more different allelic combinations). Many of these extra allelic pairs are subsequently ruled out by additional rounds of sequencing or PCR as detailed in Supplementary Table 3; this is associated with significantly increased cost and turnaround time.

**Supplementary Figure 8.** Differential fold coverage at variant positions between validated allelic pairs for each individual. The fold coverage is plotted for each allele of a heterozygous allelic pair (colored in blue and red) at positions where they differ. In case of homozygosity, the coverage is plotted for all alignment positions with symbols colored in red only. Dotted lines are exon boundaries.

**Supplementary Figure 9.** Size of allelic bias in discrete exons. Differences in fold coverage between two heterozygous alleles at each variant position are plotted as the percentage of total coverage at the same variant position. Each point represents the difference in fold coverage (y axis) at each variant position. Data are grouped by different exons and then arranged by genes (columns) and samples (rows); involved allelic pairs are shown to the right of each panel. The extent of allelic bias observed suggests that the bait for exome capture in the HLA region may benefit from additional optimization.

---

**Supplementary Algorithm 1** Contig Generation via Union-Find algorithm.

---

**Require:** merged paired-end reads

- 1: Initialize each read to be a contig, record base frequency for each position
  - 2:  $l \leftarrow$  max read length
  - 3: Decompose contigs into  $l$ -mers, for each  $l$ -mer track its contig position
  - 4: Sort  $l$ -mers by the order of decreasing frequency
  - 5: Each contig is initialized to be a root node of a tree
  - 6: **repeat**
  - 7:   **for** each  $l$ -mer **do**
  - 8:     **for** each pair of contigs  $(C_i, C_j)$  indexed by this  $l$ -mer **do**
  - 9:       **if** the roots of  $C_i$  and  $C_j$  differ in the tree **then**
  - 10:          Obtain the two contigs corresponding to the two roots
  - 11:          Generate alignment for these two contigs by matching the  $l$ -mer
  - 12:          **if** the alignment is consistent **then**
  - 13:             Merge two contigs form a new contig
  - 14:             Assign the merged contig to one root and assign this  
              root as the parent to the root of the other contig
  - 15:             Accumulate base count for each contig position
  - 16:          **end if**
  - 17:       **end if**
  - 18:     **end for**
  - 19:   **end for**
  - 20:   Decrease  $l$  by a constant number (default 10)
  - 21: **until**  $l \leq$  minimum length (default 40)
-

Supplementary Table 1. Sequences of typed HLA genes included in the reference\*

| Genes†   | gDNA sequences |                    |               | cDNA sequences |                    |            |
|----------|----------------|--------------------|---------------|----------------|--------------------|------------|
|          | Count          | Median length (bp) | Range (bp)    | Count          | Median length (bp) | Range (bp) |
| HLA-A    | 112            | 3332.5             | 2903 - 3518   | 1884           | 546                | 540 - 1163 |
| HLA-B    | 149            | 3312               | 1208 - 3340   | 2489           | 546                | 531 - 1208 |
| HLA-C    | 101            | 3343               | 2700 - 3368   | 1382           | 546                | 544 - 1197 |
| HLA-DRB1 | 26             | 13463.5            | 10299 - 16120 | 1092           | 270                | 222 - 801  |
| HLA-DQB1 | 18             | 7107               | 6800 - 7480   | 165            | 270                | 148 - 810  |

\*Based on IMGT/HLA Database Release 3.8.

†The other off-target genes in the reference include DMA, DMB, DOA, DOB, DPA1, DPB1, DQA1, DRA, DRB3, DRB4, DRB5, E, F, G, H, J, K, L, MICA, MICB, P, TAP1, TAP2, V. They are less polymorphic compared to the HLA genes being typed, and both gDNA and cDNA sequences available are included.

Supplementary Table 2. Characteristics of exome-seq data used for *in silico* HLA typing

| Sample                                  | Run ID         | Study*              | Sequencing facility† | Population   | Country     | Capture platforms | Instrument | Read count (≥10X) | Exome coverage |
|-----------------------------------------|----------------|---------------------|----------------------|--------------|-------------|-------------------|------------|-------------------|----------------|
| <i>Samples with adequate coverage</i>   |                |                     |                      |              |             |                   |            |                   |                |
| HG01756                                 | SRR359102      | 1000 Genomes        | WUGI                 | Iberian      | Spain       | V2 (SureSelect)   | GAllx      | 190644090         | 97%            |
| HG01757                                 | SRR359103      | 1000 Genomes        | WUGI                 | Iberian      | Spain       | V2 (SureSelect)   | GAllx      | 192645934         | 97%            |
| HG01872                                 | SRR359298      | 1000 Genomes        | WUGI                 | Kinh         | Vietnam     | V2 (SureSelect)   | GAllx      | 200139823         | 97%            |
| HG01873                                 | SRR359295      | 1000 Genomes        | WUGI                 | Kinh         | Vietnam     | V2 (SureSelect)   | GAllx      | 203842382         | 97%            |
| HG01886                                 | SRR360655      | 1000 Genomes        | WUGI                 | African      | Barbados    | V2 (SureSelect)   | GAllx      | 182195662         | 97%            |
| HG01953                                 | SRR360288      | 1000 Genomes        | WUGI                 | Peruvian     | Peru        | V2 (SureSelect)   | GAllx      | 182525408         | 96%            |
| HG01968                                 | SRR360391      | 1000 Genomes        | WUGI                 | Peruvian     | Peru        | V2 (SureSelect)   | GAllx      | 193999086         | 96%            |
| HG02014                                 | SRR360148      | 1000 Genomes        | WUGI                 | African      | Barbados    | V2 (SureSelect)   | GAllx      | 174553282         | 97%            |
| HG02057                                 | SRR359301      | 1000 Genomes        | WUGI                 | Kinh         | Vietnam     | V2 (SureSelect)   | GAllx      | 204351266         | 97%            |
| NA20313                                 | SRR359098      | 1000 Genomes        | WUGI                 | African      | USA         | V2 (SureSelect)   | GAllx      | 194492515         | 98%            |
| NA20313R‡                               | SRR359108      | 1000 Genomes        | WUGI                 | African      | USA         | V2 (SureSelect)   | GAllx      | 195282918         | 98%            |
| NA18507                                 | 0635_7_ATCGAGC | Internal Validation | GTAC                 | Yoruba       | Nigeria     | V3 (SureSelect)   | HiSeq2000  | 192099768         | 96%            |
| NA19129                                 | 0635_6_CACCTCC | Internal Validation | GTAC                 | Yoruba       | Nigeria     | V3 (SureSelect)   | HiSeq2000  | 208046924         | 97%            |
| NA19240                                 | 0635_7_TACTCTA | Internal Validation | GTAC                 | Yoruba       | Nigeria     | V3 (SureSelect)   | HiSeq2000  | 189722418         | 97%            |
| NA19240R‡                               | 0636_4_CTCAATG | Internal Validation | GTAC                 | Yoruba       | Nigeria     | V3 (SureSelect)   | HiSeq2000  | 177544782         | 96%            |
| <i>Samples with inadequate coverage</i> |                |                     |                      |              |             |                   |            |                   |                |
| HG01515                                 | SRR231271      | 1000 Genomes        | WUGI                 | Iberian      | Spain       | V2 (SureSelect)   | HiSeq2000  | 80709178          | 92%            |
| HG01049                                 | SRR107086      | 1000 Genomes        | BI                   | Puerto Rican | Puerto Rico | V2 (SureSelect)   | HiSeq2000  | 151803340         | 95%            |
| HG00731                                 | SRR107083      | 1000 Genomes        | BI                   | Puerto Rican | Puerto Rico | V2 (SureSelect)   | HiSeq2000  | 151983152         | 96%            |
| NA18526                                 | ERR031854      | 1000 Genomes        | BGI                  | Chinese      | China       | V1 (Nimblegen)    | HiSeq2000  | 50730605          | 80%            |
| NA18605                                 | ERR031873      | 1000 Genomes        | BGI                  | Chinese      | China       | V1 (Nimblegen)    | HiSeq2000  | 50730605          | 80%            |

\*1000 Genomes project (<ftp://ftp-trace.ncbi.nih.gov/1000genomes/ftp/data/>); the data from the internal validation study are available upon request.

†WUGI, Washington University Genome Institute; GTAC, Genome Technology Access Center at Washington University; BI, Broad Institute. All samples were sequenced as paired-end reads (2 X 101 bps).

‡Duplicate sequencing of NA20313 and NA19240.

Supplementary Table 3. HLA typing results using exome-seq data and the laboratory validation

| Sample   | Gene        | Exome reads |             |             |             | Laboratory validation |              |             |                    |          |                     |          |
|----------|-------------|-------------|-------------|-------------|-------------|-----------------------|--------------|-------------|--------------------|----------|---------------------|----------|
|          |             | ATHLATES    |             | HLAminer*   |             | SBT#                  |              |             | Additional typing‡ |          | Final type assigned |          |
|          |             | Allele 1    | Allele 2    | Alleles     | Confidence  | Allele 1              | Allele 2     | Note†       | Allele 1           | Allele 2 | Allele 1            | Allele 2 |
| HG01756  | HLA-A       | 30:02:01    | 66:01       | 30:01       | 136.1       | 30:02:01              | 66:01        |             |                    |          | 30:02:01            | 66:01    |
|          |             |             |             | 30:04       | 136.1       | 30:25                 | 66:05        | Zrr         |                    |          |                     |          |
|          |             |             |             | 30:02       | 127.2       |                       |              |             |                    |          |                     |          |
|          |             |             |             | 66:01       | 137.2       |                       |              |             |                    |          |                     |          |
|          | HLA-B       | 18:01:01:01 | 41:02:01    | 18:26       | 157.8       | 18:01:01:01           | 41:02:01     |             |                    |          | 18:RRG              | 41:02    |
|          |             |             |             | 18:01:01:01 | 157.8       | 18:01:01:02           | 41:02:01     |             |                    |          |                     |          |
|          |             |             |             | 18:01:01:02 | 147.2       | 18:17N                | 41:02:01     | Sr-         |                    |          |                     |          |
|          |             |             |             | 41:01       | 152         | 18:14                 | 41:03:02     | Z           |                    |          |                     |          |
|          |             |             |             | 45:04       | 57.7        | 18:39                 | 41:02:01     | Zr-         |                    |          |                     |          |
|          |             |             |             | 45:01       | 57.7        | 18:69                 | 41:02:01     | Zr-         |                    |          |                     |          |
|          |             |             |             | 50:01       | 57.7        |                       |              |             |                    |          |                     |          |
|          | 15:83       | 57.7        |             |             |             |                       |              |             |                    |          |                     |          |
|          | HLA-C       | 05:01:01:01 | 17:01:01:01 | 05:01       | 162.7       | 05:01:01:01           | 17:01:01:01  |             |                    |          | 05:01               | 17:MN    |
|          |             |             |             | 17:01       | 197.2       | 05:01:01:01           | 17:01:01:02  |             |                    |          |                     |          |
|          |             |             |             |             |             | 05:01:01:01           | 17:02        | -r          |                    |          |                     |          |
|          |             |             |             |             | 05:01:01:02 | 17:01:01:01           |              |             |                    |          |                     |          |
|          |             |             |             |             | 05:01:01:01 | 17:03                 |              |             |                    |          |                     |          |
|          |             |             |             |             | 05:01:01:02 | 17:01:01:01           |              |             |                    |          |                     |          |
|          |             |             |             |             | 05:01:01:02 | 17:01:01:02           |              |             |                    |          |                     |          |
|          |             |             |             |             | 05:01:01:02 | 17:02                 | -r           |             |                    |          |                     |          |
|          |             |             |             |             | 05:01:01:02 | 17:03                 |              |             |                    |          |                     |          |
|          |             |             |             |             | 05:01:12    | 17:01:04              | Z            |             |                    |          |                     |          |
| HLA-DRB1 | 03:01:01:01 | 03:01:01:01 | 03:01       | 162.4       | 03:01:01:01 | 03:01:01:01           |              |             |                    | 03:01    | 03:01               |          |
|          |             |             | 07:01       | 87.4        | 03:01:01:01 | 03:01:01:02           |              |             |                    |          |                     |          |
|          |             |             |             |             | 03:01:01:01 | 03:01:08              | S            |             |                    |          |                     |          |
|          |             |             |             |             | 03:01:01:02 | 03:01:01:02           |              |             |                    |          |                     |          |
|          |             |             |             |             | 03:01:01:02 | 03:01:08              | S            |             |                    |          |                     |          |
| HLA-DQB1 | 02:01:01    | 02:01:01    | 02:01       | 141.3       | 02:01:01    | 02:01:01              |              |             |                    | 02:01:01 | 02:01:01            |          |
|          |             |             |             |             |             |                       |              |             |                    |          |                     |          |
| HG01757  | HLA-A       | 01:01:01:01 | 02:01:01:01 | 01:03       | 249.1       | 01:01:01:01           | 02:01:01:01  |             |                    |          | 01:BMMP             | 02:01    |
|          |             |             |             | 01:01       | 249.1       | 01:01:01:01           | 02:01:01:02L | -r          |                    |          |                     |          |
|          |             |             |             | 02:01       | 116.4       | 01:01:01:01           | 02:01:01:03  |             |                    |          |                     |          |
|          |             |             |             | 02:03       | 116.4       | 01:01:01:02N          | 02:01:01:01  | r-          |                    |          |                     |          |
|          |             |             |             | 68:08       | 69.2        | 01:01:01:02N          | 02:01:01:02L | rr          |                    |          |                     |          |
|          |             |             |             | 11:02       | 74.1        | 01:01:01:02N          | 02:01:01:03  | r-          |                    |          |                     |          |
|          |             |             |             |             |             | 01:01:13              | 02:01:02     | Z           |                    |          |                     |          |
|          |             |             |             |             |             | 01:01:21              | 02:01:09     | Z           |                    |          |                     |          |
|          |             |             |             |             |             | 01:14                 | 02:101:01    | Zrr         |                    |          |                     |          |
|          |             |             |             |             |             | 01:30                 | 02:246       | Zrr         |                    |          |                     |          |
|          |             |             |             |             |             | 01:66                 | 02:338       | Zrr         |                    |          |                     |          |
|          |             |             |             |             |             | 01:98                 | 02:262       | Zrr         |                    |          |                     |          |
|          | HLA-B       | 18:01:01:01 | 57:01:01    | 57:01       | 304         | 18:01:01:01           | 57:01:01     |             | 18:01              |          | 18:01               | 57:01    |
|          |             |             |             | 18:01:01:02 | 216.8       | 18:01:01:02           | 57:01:01     |             |                    |          |                     |          |
|          |             |             |             | 18:03       | 218.1       | 18:17N                | 57:01:01     | Sr-         |                    |          |                     |          |
|          |             |             |             |             |             | 18:36                 | 57:26        | Zrr         |                    |          |                     |          |
|          |             |             |             |             |             | 18:49                 | 57:60        | Zr-         |                    |          |                     |          |
|          |             |             |             |             |             | 18:68                 | 57:10        | Zrr         |                    |          |                     |          |
|          | HLA-C       | 07:01:01:01 | 07:01:01:01 | 07:01       | 146.2       | 07:01:01:01           | 07:01:01:01  |             |                    |          | 07:WTR              | 07:WTR   |
|          |             |             |             |             |             | 07:01:01:01           | 07:01:01:02  |             |                    |          |                     |          |
|          |             |             |             |             |             | 07:01:01:01           | 07:01:02     |             |                    |          |                     |          |
|          |             |             |             |             |             | 07:01:01:01           | 07:06        |             |                    |          |                     |          |
|          |             |             |             |             | 07:01:01:01 | 07:18                 |              |             |                    |          |                     |          |
|          |             |             |             |             | 07:01:01:02 | 07:01:01:02           |              |             |                    |          |                     |          |
|          |             |             |             |             | 07:01:01:02 | 07:01:02              |              |             |                    |          |                     |          |
|          |             |             |             |             | 07:01:01:02 | 07:06                 |              |             |                    |          |                     |          |
|          |             |             |             |             | 07:01:01:02 | 07:18                 |              |             |                    |          |                     |          |
|          |             |             |             |             | 07:01:02    | 07:01:02              |              |             |                    |          |                     |          |
|          |             |             |             |             | 07:01:02    | 07:06                 |              |             |                    |          |                     |          |
|          |             |             |             |             | 07:01:02    | 07:18                 |              |             |                    |          |                     |          |
| HLA-DRB1 |             |             |             | 03:01:01:01 | 07:01:01:01 | 07:01                 | 273          | 03:01:01:01 | 07:01:01:01        |          |                     |          |
|          | 03:01       | 231.2       | 03:01:01:01 |             |             | 07:01:01:02           |              |             |                    |          |                     |          |



Supplementary Table 3. HLA typing results using exome-seq data and the laboratory validation

| Sample  | Gene     | Exome reads        |             |           |            | Laboratory validation |              |       |                    |          |                     |          |
|---------|----------|--------------------|-------------|-----------|------------|-----------------------|--------------|-------|--------------------|----------|---------------------|----------|
|         |          | ATHLATES           |             | HLAminer* |            | SBT#                  |              |       | Additional typing‡ |          | Final type assigned |          |
|         |          | Allele 1           | Allele 2    | Alleles   | Confidence | Allele 1              | Allele 2     | Note† | Allele 1           | Allele 2 | Allele 1            | Allele 2 |
|         |          | 03:01:01:02        | 07:01:01:01 | 08:03     | 56.4       | 03:01:01:02           | 07:01:01:01  |       |                    |          |                     |          |
|         |          | 03:01:01:02        | 07:01:01:02 |           |            | 03:01:01:02           | 07:01:01:02  |       |                    |          |                     |          |
|         | HLA-DQB1 | 02:01:01           | 03:03:02:01 | 02:01     | 223        | 02:01:01              | 03:03:02:01  |       |                    |          | 02:01               | 03:03    |
|         |          | 02:01:01           | 03:03:02:02 | 03:03     | 164.6      | 02:01:01              | 03:03:02:02  |       |                    |          |                     |          |
|         |          | 02:01:01           | 03:03:02:03 |           |            | 02:01:01              | 03:03:02:03  |       |                    |          |                     |          |
|         |          |                    |             |           |            | 02:03                 | 03:02:01     | Z     |                    |          |                     |          |
| HG01872 | HLA-A    | 11:02:01           | 24:07       | 11:02     | 300.3      | 11:02:01              | 24:07        |       |                    |          | 11:PVND             | 24:07    |
|         |          | 11:77 <sup>a</sup> | 24:07       | 11:01     | 293.3      | 11:110                | 24:07        | Sr-   |                    |          |                     |          |
|         |          |                    |             | 11:50     | 271.5      |                       |              |       |                    |          |                     |          |
|         |          |                    |             | 24:08     | 235.2      |                       |              |       |                    |          |                     |          |
|         |          |                    |             | 24:07     | 235.2      |                       |              |       |                    |          |                     |          |
|         |          |                    |             | 24:02     | 235.2      |                       |              |       |                    |          |                     |          |
|         |          |                    |             | 24:20     | 235.2      |                       |              |       |                    |          |                     |          |
|         | HLA-B    | 27:04:01           | 39:05:01    | 27:04     | 174.1      | 27:04:01              | 39:05:01     |       |                    |          | 27:04:01            | 39:05:01 |
|         |          |                    |             | 27:25     | 91.4       |                       |              |       |                    |          |                     |          |
|         |          |                    |             | 39:34     | 106.1      |                       |              |       |                    |          |                     |          |
|         |          |                    |             | 40:02     | 90.6       |                       |              |       |                    |          |                     |          |
|         |          |                    |             | 40:06     | 90.6       |                       |              |       |                    |          |                     |          |
|         | HLA-C    | 08:01:01           | 12:02:02    | 08:21     | 235        | 08:01:01              | 12:02:02     |       | 08:01              |          | 08:01               | 12:02    |
|         |          |                    |             | 08:01     | 187.5      | 08:01:02              | 12:02:03     | Z     |                    |          |                     |          |
|         |          |                    |             | 12:03     | 176.8      | 08:01:06              | 12:02:07     | Z     |                    |          |                     |          |
|         |          |                    |             | 12:02     | 176.8      | 08:21                 | 12:49        | Zrr   |                    |          |                     |          |
|         |          |                    |             |           |            | 08:22                 | 12:02:02     | r-    |                    |          |                     |          |
|         | HLA-DRB1 | 08:03:02           | 12:02:01    | 07:01     | 114.2      | 08:03:02              | 12:02:01     |       |                    |          | 08:03:02            | 12:02:01 |
|         |          |                    |             | 08:03     | 222.5      |                       |              |       |                    |          |                     |          |
|         |          |                    |             | 12:01     | 137.4      |                       |              |       |                    |          |                     |          |
|         |          |                    |             | 14:05     | 34.8       |                       |              |       |                    |          |                     |          |
|         |          |                    |             | 14:54:01  | 34.8       |                       |              |       |                    |          |                     |          |
|         | HLA-DQB1 | 06:01:01           | 03:01:01:01 | 06:01     | 192.3      | 06:01:01              | 03:01:01:01  |       |                    |          | 06:01               | 03:01    |
|         |          | 06:01:01           | 03:01:01:02 | 03:01     | 181        | 06:01:01              | 03:01:01:02  |       |                    |          |                     |          |
|         |          | 06:01:01           | 03:01:01:03 |           |            | 06:01:01              | 03:01:01:03  |       |                    |          |                     |          |
| HG01873 | HLA-A    | 02:03:01           | 03:01:01:01 | 03:01     | 229.9      | 02:03:01              | 03:01:01:01  |       |                    | 03:01    | 02:03               | 03:XKS   |
|         |          | 02:03:01           | 03:01:01:03 | 02:03     | 110.2      | 02:03:01              | 03:01:01:02N | -r    |                    |          |                     |          |
|         |          |                    |             |           |            | 02:03:01              | 03:01:01:03  |       |                    |          |                     |          |
|         |          |                    |             |           |            | 02:171:02             | 03:50        | Z-r   |                    |          |                     |          |
|         | HLA-B    | 35:03:01           | 55:02:01    | 35:02     | 140.6      | 35:03:01              | 55:02:01     |       |                    |          | 35:03:01            | 55:02:01 |
|         |          |                    |             | 35:14     | 140.6      | 35:06                 | 55:46        | Z-r   |                    |          |                     |          |
|         |          |                    |             | 35:41     | 140.6      |                       |              |       |                    |          |                     |          |
|         |          |                    |             | 35:01     | 140.6      |                       |              |       |                    |          |                     |          |
|         |          |                    |             | 35:03     | 104.8      |                       |              |       |                    |          |                     |          |
|         |          |                    |             | 56:01     | 156.6      |                       |              |       |                    |          |                     |          |
|         |          |                    |             | 55:02     | 147.1      |                       |              |       |                    |          |                     |          |
|         |          |                    |             | 55:01     | 147.1      |                       |              |       |                    |          |                     |          |
|         |          |                    |             | 55:48     | 147.1      |                       |              |       |                    |          |                     |          |
|         |          |                    |             | 55:24     | 147.1      |                       |              |       |                    |          |                     |          |
|         |          |                    |             | 37:01     | 48.3       |                       |              |       |                    |          |                     |          |
|         | HLA-C    | 04:01:01:01        | 12:03:01:01 | 04:01     | 188        | 04:01:01:01           | 12:03:01:01  |       | 04:01:01:01        |          | 04:01               | 12:03    |
|         |          | 04:01:01:02        | 12:03:01:01 | 04:03     | 150.4      | 04:01:01:02           | 12:03:01:01  |       | 04:01:01:02        |          |                     |          |
|         |          | 04:01:01:03        | 12:03:01:01 | 12:03     | 122.5      | 04:01:01:03           | 12:03:01:01  |       | 04:01:01:03        |          |                     |          |
|         |          | 04:01:01:04        | 12:03:01:01 | 01:08     | 97.8       | 04:01:01:04           | 12:03:01:01  |       | 04:01:01:04        |          |                     |          |
|         |          | 04:01:01:05        | 12:03:01:01 | 01:03     | 97.8       | 04:01:01:05           | 12:03:01:01  |       | 04:01:01:05        |          |                     |          |
|         |          | 04:01:01:01        | 12:03:01:02 | 01:30     | 97.8       | 04:01:01:01           | 12:03:01:02  |       | 04:01:01:01        |          |                     |          |
|         |          | 04:01:01:02        | 12:03:01:02 | 01:02     | 97.8       | 04:01:01:02           | 12:03:01:02  |       | 04:01:01:02        |          |                     |          |
|         |          | 04:01:01:03        | 12:03:01:02 | 15:17     | 78.8       | 04:01:01:03           | 12:03:01:02  |       | 04:01:01:03        |          |                     |          |
|         |          | 04:01:01:04        | 12:03:01:02 | 15:02     | 78.8       | 04:01:01:04           | 12:03:01:02  |       | 04:01:01:04        |          |                     |          |
|         |          | 04:01:01:05        | 12:03:01:02 | 15:16     | 78.8       | 04:01:01:05           | 12:03:01:02  |       | 04:01:01:05        |          |                     |          |
|         |          |                    |             | 15:05     | 78.8       | 04:01:05              | 12:03:20     | Z     | 04:01:05           |          |                     |          |
|         |          |                    |             |           |            | 04:09N                | 12:03:01:01  | S     |                    |          |                     |          |
|         |          |                    |             |           |            | 04:09N                | 12:03:01:02  | S     |                    |          |                     |          |
|         |          |                    |             |           |            | 04:30                 | 12:03:01:01  | Sr-   |                    |          |                     |          |
|         |          |                    |             |           |            | 04:30                 | 12:03:01:02  | Sr-   |                    |          |                     |          |
|         |          |                    |             |           |            | 04:82                 | 12:03:01:01  | r-    |                    |          |                     |          |
|         |          |                    |             |           |            | 04:82                 | 12:03:01:02  | r-    |                    |          |                     |          |
|         |          |                    |             |           |            | 04:94:01              | 12:24        | Zrr   |                    |          |                     |          |



Supplementary Table 3. HLA typing results using exome-seq data and the laboratory validation

| Sample  | Gene     | Exome reads  |             |           |            | Laboratory validation |             |       |                    |          |                     |          |          |
|---------|----------|--------------|-------------|-----------|------------|-----------------------|-------------|-------|--------------------|----------|---------------------|----------|----------|
|         |          | ATHLATES     |             | HLAminer* |            | SBT#                  |             |       | Additional typing‡ |          | Final type assigned |          |          |
|         |          | Allele 1     | Allele 2    | Alleles   | Confidence | Allele 1              | Allele 2    | Note† | Allele 1           | Allele 2 | Allele 1            | Allele 2 |          |
|         |          |              |             | 04:03     | 169.3      |                       |             |       |                    |          |                     |          |          |
|         | HLA-DQB1 | 03:02:01     | 03:03:02:01 | 03:02     | 113        | 03:02:01              | 03:03:02:01 |       |                    |          |                     | 03:02    | 03:03    |
|         |          | 03:02:01     | 03:03:02:02 |           |            | 03:02:01              | 03:03:02:02 |       |                    |          |                     |          |          |
|         |          | 03:02:01     | 03:03:02:03 |           |            | 03:02:01              | 03:03:02:03 |       |                    |          |                     |          |          |
| HG01968 | HLA-A    | 02:01:01:01  | 68:01:02    | 68:01     | 198.7      | 02:01:01:01           | 68:01:02    |       |                    |          |                     | 02:01    | 68:FKZ   |
|         |          | 02:01:01:02L | 68:01:02    | 02:48     | 114.5      | 02:01:01:02L          | 68:01:02    | r-    |                    |          |                     |          |          |
|         |          | 02:01:01:03  | 68:01:02    | 02:01     | 114.5      | 02:01:01:03           | 68:01:02    |       |                    |          |                     |          |          |
|         |          |              |             |           |            | 02:01:01:01           | 68:11N      | S-r   |                    |          |                     |          |          |
|         |          |              |             |           |            | 02:01:01:02L          | 68:11N      | Srr   |                    |          |                     |          |          |
|         |          |              |             |           |            | 02:01:01:03           | 68:11N      | S-r   |                    |          |                     |          |          |
|         |          |              |             |           |            | 02:04                 | 68:23       | Z     |                    |          |                     |          |          |
|         |          |              |             |           |            | 02:22:01              | 68:08:02    | Z     |                    |          |                     |          |          |
|         |          |              |             |           |            | 02:34                 | 68:03:01    | Z     |                    |          |                     |          |          |
|         |          |              |             |           |            | 02:35:01              | 68:05       | Z     |                    |          |                     |          |          |
|         |          |              |             |           |            | 02:217:02             | 68:75       | Z-r   |                    |          |                     |          |          |
|         |          |              |             |           |            | 02:245                | 68:83       | Zrr   |                    |          |                     |          |          |
|         | HLA-B    | 07:02:01     | 40:02:01    | 40:02     | 256.3      | 07:02:01              | 40:02:01    |       |                    |          |                     | 07:TDVB  | 40:02    |
|         |          |              |             | 40:06     | 256.3      | 07:02:03              | 40:02:04    | Z     |                    |          |                     |          |          |
|         |          |              |             | 07:02     | 154.1      | 07:05:01              | 40:18       | Z-r   |                    |          |                     |          |          |
|         |          |              |             |           |            | 07:06                 | 40:18       | Z-r   |                    |          |                     |          |          |
|         |          |              |             |           |            | 07:61                 | 40:02:01    | Sr-   |                    |          |                     |          |          |
|         |          |              |             |           |            | 07:91                 | 40:50       | Zr-   |                    |          |                     |          |          |
|         |          |              |             |           |            | 07:143                | 40:40       | Zr-   |                    |          |                     |          |          |
|         |          |              |             |           |            | 07:161N               | 40:02:01    | r-    |                    |          |                     |          |          |
|         | HLA-C    | 03:04:01:01  | 07:02:01:01 | 03:03     | 100.9      | 03:04:01:01           | 07:02:01:01 |       | 03:04              |          |                     | 03:04    | 07:WCP   |
|         |          | 03:04:01:01  | 07:02:01:02 | 03:04     | 100.9      | 03:04:01:01           | 07:02:01:02 |       |                    |          |                     |          |          |
|         |          | 03:04:01:01  | 07:02:01:03 | 07:02     | 124.3      | 03:04:01:01           | 07:02:01:03 |       |                    |          |                     |          |          |
|         |          | 03:04:01:02  | 07:02:01:01 |           |            | 03:04:01:01           | 07:50       | S-r   |                    |          |                     |          |          |
|         |          | 03:04:01:02  | 07:02:01:02 |           |            | 03:04:01:02           | 07:02:01:01 |       |                    |          |                     |          |          |
|         |          | 03:04:01:02  | 07:02:01:03 |           |            | 03:04:01:02           | 07:02:01:02 |       |                    |          |                     |          |          |
|         |          |              |             |           |            | 03:04:01:02           | 07:02:01:03 |       |                    |          |                     |          |          |
|         |          |              |             |           |            | 03:04:01:02           | 07:50       | S-r   |                    |          |                     |          |          |
|         |          |              |             |           |            | 03:04:19              | 07:02:04    | Z     |                    |          |                     |          |          |
|         |          |              |             |           |            | 03:04:26              | 07:02:10    | Z     |                    |          |                     |          |          |
|         |          |              |             |           |            | 03:04:27              | 07:02:32    | Z     |                    |          |                     |          |          |
|         |          |              |             |           |            | 03:32                 | 07:51       | Zrr   |                    |          |                     |          |          |
|         |          |              |             |           |            | 03:35                 | 07:10       | Zr-   |                    |          |                     |          |          |
|         |          |              |             |           |            | 03:38:02              | 07:39       | Z-r   |                    |          |                     |          |          |
|         |          |              |             |           |            | 03:40:01              | 07:29       | Z     |                    |          |                     |          |          |
|         |          |              |             |           |            | 03:41                 | 07:133      | Zrr   |                    |          |                     |          |          |
|         |          |              |             |           |            | 03:64:02              | 07:127      | Z-r   |                    |          |                     |          |          |
|         |          |              |             |           |            | 03:90                 | 07:27:01    | Zr-   |                    |          |                     |          |          |
|         |          |              |             |           |            | 03:92                 | 07:186      | Zrr   |                    |          |                     |          |          |
|         | HLA-DRB1 | 01:03        | 09:01:02    | 07:01     | 158.5      | 01:03                 | 09:01:02    |       |                    |          |                     | 01:03    | 09:01:02 |
|         |          |              |             | 01:01     | 168.5      |                       |             |       |                    |          |                     |          |          |
|         | HLA-DQB1 | 03:03:02:01  | 05:01:01:01 | 05:01     | 118        | 03:03:02:01           | 05:01:01:01 |       |                    |          |                     | 03:03    | 05:01    |
|         |          | 03:03:02:02  | 05:01:01:01 | 03:03     | 118.1      | 03:03:02:02           | 05:01:01:01 |       |                    |          |                     |          |          |
|         |          | 03:03:02:03  | 05:01:01:01 |           |            | 03:03:02:03           | 05:01:01:01 |       |                    |          |                     |          |          |
|         |          | 03:03:02:01  | 05:01:01:02 |           |            | 03:03:02:01           | 05:01:01:02 |       |                    |          |                     |          |          |
|         |          | 03:03:02:02  | 05:01:01:02 |           |            | 03:03:02:02           | 05:01:01:02 |       |                    |          |                     |          |          |
|         |          | 03:03:02:03  | 05:01:01:02 |           |            | 03:03:02:03           | 05:01:01:02 |       |                    |          |                     |          |          |
| HG02014 | HLA-A    | 02:01:01:01  | 36:01       | 01:01     | 246.7      | 02:01:01:01           | 36:01       |       |                    |          |                     | 02:01    | 36:01    |
|         |          | 02:01:01:02L | 36:01       | 36:01     | 195.1      | 02:01:01:02L          | 36:01       | r-    |                    |          |                     |          |          |
|         |          | 02:01:01:03  | 36:01       | 02:01     | 269.3      | 02:01:01:03           | 36:01       |       |                    |          |                     |          |          |
|         | HLA-B    | 35:01:01:01  | 40:01:02    | 40:79     | 286.4      | 35:01:01:01           | 40:01:01    |       |                    |          |                     | 35:TDS   | 40:01    |
|         |          | 35:01:01:02  | 40:01:02    | 40:01     | 286.4      | 35:01:01:01           | 40:01:02    |       |                    |          |                     |          |          |
|         |          |              |             | 07:41     | 188        | 35:01:01:01           | 40:88       | Z-r   |                    |          |                     |          |          |
|         |          |              |             | 07:02     | 188        | 35:01:01:02           | 40:01:01    |       |                    |          |                     |          |          |
|         |          |              |             | 07:33     | 188        | 35:01:01:02           | 40:01:02    |       |                    |          |                     |          |          |
|         |          |              |             | 07:50     | 188        | 35:01:01:02           | 40:88       | Z-r   |                    |          |                     |          |          |
|         |          |              |             | 53:01     | 243.2      | 35:01:04              | 40:01:04    | Z     |                    |          |                     |          |          |
|         |          |              |             | 35:02     | 243.2      | 35:01:17              | 40:01:17    | Z     |                    |          |                     |          |          |
|         |          |              |             | 35:41     | 243.2      | 35:01:23              | 40:01:01    |       |                    |          |                     |          |          |
|         |          |              |             | 35:01     | 243.2      | 35:01:23              | 40:01:02    |       |                    |          |                     |          |          |
|         |          |              |             |           |            | 35:01:23              | 40:88       | Z-r   |                    |          |                     |          |          |
|         |          |              |             |           |            | 35:04:01              | 40:52       | Z-r   |                    |          |                     |          |          |

Supplementary Table 3. HLA typing results using exome-seq data and the laboratory validation

| Sample   | Gene  | Exome reads |             |           |            | Laboratory validation |             |       |                    |          |                     |          |
|----------|-------|-------------|-------------|-----------|------------|-----------------------|-------------|-------|--------------------|----------|---------------------|----------|
|          |       | ATHLATES    |             | HLAminer* |            | SBT#                  |             |       | Additional typing‡ |          | Final type assigned |          |
|          |       | Allele 1    | Allele 2    | Alleles   | Confidence | Allele 1              | Allele 2    | Note† | Allele 1           | Allele 2 | Allele 1            | Allele 2 |
|          |       |             |             |           |            | 35:10                 | 40:25       | Z-r   |                    |          |                     |          |
|          |       |             |             |           |            | 35:15                 | 40:63       | Zrr   |                    |          |                     |          |
|          |       |             |             |           |            | 35:20:01              | 40:07       | Z-r   |                    |          |                     |          |
|          |       |             |             |           |            | 35:28                 | 40:106      | Z-r   |                    |          |                     |          |
|          |       |             |             |           |            | 35:20:01              | 40:07       | Z-r   |                    |          |                     |          |
|          |       |             |             |           |            | 35:28                 | 40:106      | Z-r   |                    |          |                     |          |
|          |       |             |             |           |            | 35:34                 | 40:38       | Z-r   |                    |          |                     |          |
|          |       |             |             |           |            | 35:42:01              | 40:01:01    | r-    |                    |          |                     |          |
|          |       |             |             |           |            | 35:42:01              | 40:01:02    | r-    |                    |          |                     |          |
|          |       |             |             |           |            | 35:42:01              | 40:88       | Zrr   |                    |          |                     |          |
|          |       |             |             |           |            | 35:64:02              | 40:87:02    | Z     |                    |          |                     |          |
|          |       |             |             |           |            | 35:68:01              | 40:160:01   | Zrr   |                    |          |                     |          |
|          |       |             |             |           |            | 35:68:02              | 40:160:02   | Z     |                    |          |                     |          |
|          |       |             |             |           |            | 35:119                | 40:01:01    | Zr-   |                    |          |                     |          |
|          |       |             |             |           |            | 35:119                | 40:01:02    | Zr-   |                    |          |                     |          |
|          |       |             |             |           |            | 35:119                | 40:88       | Zrr   |                    |          |                     |          |
| HLA-C    |       | 03:04:01:01 | 04:01:01:01 | 04:01     | 260.4      | 03:04:01:01           | 04:01:01:01 |       |                    |          | 03:04               | 04:JERF  |
|          |       | 03:04:01:01 | 04:01:01:02 | 04:03     | 221        | 03:04:01:01           | 04:01:01:02 |       |                    |          |                     |          |
|          |       | 03:04:01:01 | 04:01:01:03 | 04:06     | 221        | 03:04:01:01           | 04:01:01:03 |       |                    |          |                     |          |
|          |       | 03:04:01:01 | 04:01:01:04 | 03:02     | 213.3      | 03:04:01:01           | 04:01:01:04 |       |                    |          |                     |          |
|          |       | 03:04:01:01 | 04:01:01:05 | 03:04     | 213.3      | 03:04:01:01           | 04:01:01:05 |       |                    |          |                     |          |
|          |       | 03:04:01:02 | 04:01:01:01 | 15:17     | 36.2       | 03:04:01:01           | 04:09N      | S     |                    |          |                     |          |
|          |       | 03:04:01:02 | 04:01:01:02 | 15:02     | 36.2       | 03:04:01:01           | 04:30       | S-r   |                    |          |                     |          |
|          |       | 03:04:01:02 | 04:01:01:03 | 15:16     | 36.2       | 03:04:01:01           | 04:82       | -r    |                    |          |                     |          |
|          |       | 03:04:01:02 | 04:01:01:04 | 15:05     | 36.2       | 03:04:01:02           | 04:01:01:01 |       |                    |          |                     |          |
|          |       | 03:04:01:02 | 04:01:01:05 |           |            | 03:04:01:02           | 04:01:01:02 |       |                    |          |                     |          |
|          |       |             |             |           |            | 03:04:01:02           | 04:01:01:03 |       |                    |          |                     |          |
|          |       |             |             |           |            | 03:04:01:02           | 04:01:01:04 |       |                    |          |                     |          |
|          |       |             |             |           |            | 03:04:01:02           | 04:01:01:05 |       |                    |          |                     |          |
|          |       |             |             |           |            | 03:04:01:02           | 04:09N      | S     |                    |          |                     |          |
|          |       |             |             |           |            | 03:04:01:02           | 04:30       | S-r   |                    |          |                     |          |
|          |       |             |             |           |            | 03:04:01:02           | 04:82       | -r    |                    |          |                     |          |
|          |       |             |             |           |            | 03:04:25              | 04:01:23    | Z     |                    |          |                     |          |
|          |       |             |             |           |            | 03:04:26              | 04:01:39    | Z     |                    |          |                     |          |
|          |       |             |             |           |            | 03:07                 | 04:29       | Z-r   |                    |          |                     |          |
|          |       |             |             |           |            | 03:10                 | 04:114      | Z-r   |                    |          |                     |          |
|          |       |             |             |           |            | 03:28                 | 04:04:01    | Zr-   |                    |          |                     |          |
|          |       |             |             |           |            | 03:32                 | 04:33       | Zrr   |                    |          |                     |          |
|          |       |             |             |           |            | 03:35                 | 04:110      | Zrr   |                    |          |                     |          |
|          |       |             |             |           |            | 03:38:02              | 04:10       | Z     |                    |          |                     |          |
|          |       |             |             |           |            | 03:92                 | 04:08       | Zr-   |                    |          |                     |          |
|          |       |             |             |           |            | 03:98                 | 04:85       | Zrr   |                    |          |                     |          |
|          |       |             |             |           |            | 03:163                | 04:36       | Zrr   |                    |          |                     |          |
| HLA-DRB1 |       | 01:01:01    | 15:01:01:01 | 07:01     | 104.4      | 01:01:01              | 15:01:01:01 |       |                    |          | 01:01               | 15:01    |
|          |       | 01:01:01    | 15:01:01:02 | 15:01     | 197.9      | 01:01:01              | 15:01:01:02 |       |                    |          |                     |          |
|          |       | 01:01:01    | 15:01:01:03 | 01:01     | 209.9      | 01:01:01              | 15:01:01:03 |       |                    |          |                     |          |
|          |       | 01:01:01    | 15:01:01:04 | 01:02     | 209.9      | 01:01:01              | 15:01:01:04 |       |                    |          |                     |          |
|          |       |             |             |           |            | 01:01:01              | 15:01:17    |       |                    |          |                     |          |
| HLA-DQB1 |       | 05:01:01:01 | 06:02:01    | 06:02     | 218.5      | 05:01:01:01           | 06:02:01    |       |                    |          | 05:01               | 06:02    |
|          |       | 05:01:01:02 | 06:02:01    | 05:01     | 222.2      | 05:01:01:02           | 06:02:01    |       |                    |          |                     |          |
| HG02057  | HLA-A | 02:03:01    | 31:01:02    | 31:01     | 269.3      | 02:03:01              | 31:01:02    |       |                    |          | 02:03:01            | 31:01:02 |
|          |       |             |             | 02:03     | 148.3      | 02:171:02             | 31:30       | Z-r   |                    |          |                     |          |
|          |       |             |             | 32:01     | 52.7       |                       |             |       |                    |          |                     |          |
|          |       |             |             | 74:01     | 52.7       |                       |             |       |                    |          |                     |          |
|          |       |             |             | 74:11     | 52.7       |                       |             |       |                    |          |                     |          |
|          |       |             |             | 11:02     | 38.9       |                       |             |       |                    |          |                     |          |
| HLA-B    |       | 13:01:01    | 48:01:01    | 48:01     | 224.8      | 13:01:01              | 48:01:01    |       |                    |          | 13:01               | 48:01    |
|          |       |             |             | 13:01     | 152.2      | 13:01:01              | 48:03:01    | Z     |                    |          |                     |          |
|          |       |             |             |           |            | 13:01:01              | 48:03:02    | Z     |                    |          |                     |          |
|          |       |             |             |           |            | 13:01:01              | 48:21       | Z-r   |                    |          |                     |          |
|          |       |             |             |           |            | 13:01:05              | 48:01:01    |       |                    |          |                     |          |
|          |       |             |             |           |            | 13:01:05              | 48:03:01    | Z     |                    |          |                     |          |
|          |       |             |             |           |            | 13:01:05              | 48:21       | Z-r   |                    |          |                     |          |
|          |       |             |             |           |            | 13:02:01              | 48:01:01    |       |                    |          |                     |          |
|          |       |             |             |           |            | 13:02:01              | 48:03:01    | Z     |                    |          |                     |          |
|          |       |             |             |           |            | 13:02:01              | 48:03:02    | Z     |                    |          |                     |          |



Supplementary Table 3. HLA typing results using exome-seq data and the laboratory validation

| Sample               | Gene     | Exome reads |             |           |            | Laboratory validation |             |       |                    |          |                     |          |  |
|----------------------|----------|-------------|-------------|-----------|------------|-----------------------|-------------|-------|--------------------|----------|---------------------|----------|--|
|                      |          | ATHLATES    |             | HLAminer* |            | SBT#                  |             |       | Additional typing‡ |          | Final type assigned |          |  |
|                      |          | Allele 1    | Allele 2    | Alleles   | Confidence | Allele 1              | Allele 2    | Note† | Allele 1           | Allele 2 | Allele 1            | Allele 2 |  |
|                      |          |             |             | 07:01     | 91.6       |                       |             |       |                    |          |                     |          |  |
|                      | HLA-DQB1 | 03:19       | 05:01:01:01 | 05:01     | 196.5      | 03:19                 | 05:01:01:01 |       |                    |          | 03:19               | 05:01    |  |
|                      |          | 03:19       | 05:01:01:02 | 03:01     | 153.2      | 03:19                 | 05:01:01:02 |       |                    |          |                     |          |  |
| NA19240 <sup>d</sup> | HLA-A    | 30:01:01    | 68:02:01:01 | 68:02     | 217.9      | 30:01:01              | 68:02:01:01 |       |                    |          | 30:01               | 68:02    |  |
|                      |          | 30:01:01    | 68:02:01:02 | 30:01     | 209.3      | 30:01:01              | 68:02:01:02 |       |                    |          |                     |          |  |
|                      |          | 30:01:01    | 68:02:01:03 | 11:02     | 46.6       | 30:01:01              | 68:02:01:03 |       |                    |          |                     |          |  |
|                      |          |             |             | 34:01     | 46.8       |                       |             |       |                    |          |                     |          |  |
|                      | HLA-B    | 35:01:01:01 | 57:03:01    | 57:01     | 177.3      | 35:01:01:01           | 57:03:01    |       | 35:01              | 57:03    | 35:01               | 57:03    |  |
|                      |          | 35:01:01:02 | 57:03:01    | 35:02     | 122.6      | 35:01:01:02           | 57:03:01    |       |                    |          |                     |          |  |
|                      |          |             |             | 35:41     | 122.6      | 35:01:23              | 57:03:01    |       |                    |          |                     |          |  |
|                      |          |             |             | 35:01     | 122.6      | 35:04:01              | 57:01:01    | Z     |                    |          |                     |          |  |
|                      |          |             |             | 35:14     | 122.6      | 35:04:01              | 57:21       | Z-r   |                    |          |                     |          |  |
|                      |          |             |             | 35:03     | 122.6      | 35:04:01              | 57:40       | Z-r   |                    |          |                     |          |  |
|                      |          |             |             | 35:08     | 122.6      | 35:42:01              | 57:03:01    | r-    |                    |          |                     |          |  |
|                      |          |             |             | 35:05     | 122.6      | 35:68:01              | 57:03:01    | r-    |                    |          |                     |          |  |
|                      |          |             |             | 53:01     | 113.1      | 35:119                | 57:03:01    | r-    |                    |          |                     |          |  |
|                      | HLA-C    | 04:01:01:01 | 18:02       | 04:01     | 215.4      | 04:01:01:01           | 18:01       |       | 04:01              | 18:02    | 04:01               | 18:02    |  |
|                      |          | 04:01:01:02 | 18:02       | 18:01     | 155        | 04:01:01:01           | 18:02       |       |                    |          |                     |          |  |
|                      |          | 04:01:01:03 | 18:02       |           |            | 04:01:01:02           | 18:01       |       |                    |          |                     |          |  |
|                      |          | 04:01:01:04 | 18:02       |           |            | 04:01:01:02           | 18:02       |       |                    |          |                     |          |  |
|                      |          | 04:01:01:05 | 18:02       |           |            | 04:01:01:03           | 18:01       |       |                    |          |                     |          |  |
|                      |          |             |             |           |            | 04:01:01:03           | 18:02       |       |                    |          |                     |          |  |
|                      |          |             |             |           |            | 04:01:01:04           | 18:01       |       |                    |          |                     |          |  |
|                      |          |             |             |           |            | 04:01:01:04           | 18:02       |       |                    |          |                     |          |  |
|                      |          |             |             |           |            | 04:01:01:05           | 18:01       |       |                    |          |                     |          |  |
|                      |          |             |             |           |            | 04:01:01:05           | 18:02       |       |                    |          |                     |          |  |
|                      |          |             |             |           |            | 04:09N                | 18:01       | S     |                    |          |                     |          |  |
|                      |          |             |             |           |            | 04:09N                | 18:02       | S     |                    |          |                     |          |  |
|                      |          |             |             |           |            | 04:30                 | 18:01       | Sr-   |                    |          |                     |          |  |
|                      |          |             |             |           |            | 04:30                 | 18:02       | Sr-   |                    |          |                     |          |  |
|                      |          |             |             |           |            | 04:82                 | 18:01       | r-    |                    |          |                     |          |  |
|                      |          |             |             |           |            | 04:82                 | 18:02       | r-    |                    |          |                     |          |  |
|                      | HLA-DRB1 | 12:01:01    | 16:02:01    | 16:02     | 219.9      | 12:01:01              | 16:02:01    |       |                    |          | 12:DUKV             | 16:02    |  |
|                      |          |             |             | 12:01     | 297.2      | 12:06                 | 16:02:01    | Sr-   |                    |          |                     |          |  |
|                      |          |             |             | 15:01     | 106.6      | 12:10                 | 16:02:01    | Sr-   |                    |          |                     |          |  |
|                      |          |             |             | 15:03     | 106.6      | 12:17                 | 16:02:01    | Sr-   |                    |          |                     |          |  |
|                      |          |             |             | 07:01     | 90.5       |                       |             |       |                    |          |                     |          |  |
|                      |          |             |             | 14:05     | 34.8       |                       |             |       |                    |          |                     |          |  |
|                      |          |             |             | 14:54:01  | 34.8       |                       |             |       |                    |          |                     |          |  |
|                      |          |             |             | 08:03     | 39.4       |                       |             |       |                    |          |                     |          |  |
|                      | HLA-DQB1 | 03:01:01:01 | 05:02:01    | 03:01     | 162.6      | 03:01:01:01           | 05:02:01    |       |                    |          | 03:01               | 05:02    |  |
|                      |          | 03:01:01:02 | 05:02:01    | 05:03     | 70.2       | 03:01:01:02           | 05:02:01    |       |                    |          |                     |          |  |
|                      |          | 03:01:01:03 | 05:02:01    | 05:01     | 41.6       | 03:01:01:03           | 05:02:01    |       |                    |          |                     |          |  |
| NA20313 <sup>d</sup> | HLA-A    | 03:01:01:01 | 68:02:01:01 | NR        |            | 03:01:01:01           | 68:02:01:01 |       |                    |          | 03:XKS              | 68:02    |  |
|                      |          | 03:01:01:01 | 68:02:01:02 |           |            | 03:01:01:01           | 68:02:01:02 |       |                    |          |                     |          |  |
|                      |          | 03:01:01:01 | 68:02:01:03 |           |            | 03:01:01:01           | 68:02:01:03 |       |                    |          |                     |          |  |
|                      |          | 03:01:01:03 | 68:02:01:01 |           |            | 03:01:01:02N          | 68:02:01:01 | r-    |                    |          |                     |          |  |
|                      |          | 03:01:01:03 | 68:02:01:02 |           |            | 03:01:01:02N          | 68:02:01:02 | r-    |                    |          |                     |          |  |
|                      |          | 03:01:01:03 | 68:02:01:03 |           |            | 03:01:01:02N          | 68:02:01:03 | r-    |                    |          |                     |          |  |
|                      |          |             |             |           |            | 03:01:01:03           | 68:02:01:01 |       |                    |          |                     |          |  |
|                      |          |             |             |           |            | 03:01:01:03           | 68:02:01:02 |       |                    |          |                     |          |  |
|                      |          |             |             |           |            | 03:01:01:03           | 68:02:01:03 |       |                    |          |                     |          |  |
|                      |          |             |             |           |            | 03:07                 | 68:54       | Z-r   |                    |          |                     |          |  |
|                      | HLA-B    | 35:01:01:01 | 53:01:01    | NR        |            | 35:01:01:01           | 53:01:01    |       | 35:01              | 53:01    | 35:01               | 53:01    |  |
|                      |          | 35:01:01:02 | 53:01:01    |           |            | 35:01:01:02           | 53:01:01    |       | 35:42              | 53:01    | 35:42               | 53:01    |  |
|                      |          |             |             |           |            | 35:01:23              | 53:01:01    |       |                    |          |                     |          |  |
|                      |          |             |             |           |            | 35:27                 | 53:05       |       |                    |          |                     |          |  |
|                      |          |             |             |           |            | 35:42:01              | 53:01:01    | r     |                    |          |                     |          |  |
|                      | HLA-C    | 04:01:01:01 | 04:01:01:01 | 04:01     | 38.3       | 04:01:01:01           | 04:01:01:01 |       |                    |          | 04:JERF             | 04:JERF  |  |
|                      |          | 04:01:01:01 | 04:01:01:02 |           |            | 04:01:01:01           | 04:01:01:02 |       |                    |          |                     |          |  |
|                      |          | 04:01:01:01 | 04:01:01:03 |           |            | 04:01:01:01           | 04:01:01:03 |       |                    |          |                     |          |  |
|                      |          | 04:01:01:01 | 04:01:01:04 |           |            | 04:01:01:01           | 04:01:01:04 |       |                    |          |                     |          |  |
|                      |          | 04:01:01:01 | 04:01:01:05 |           |            | 04:01:01:01           | 04:01:01:05 |       |                    |          |                     |          |  |
|                      |          | 04:01:01:02 | 04:01:01:02 |           |            | 04:01:01:01           | 04:09N      |       |                    |          |                     |          |  |
|                      |          | 04:01:01:02 | 04:01:01:03 |           |            | 04:01:01:01           | 04:30       |       |                    |          |                     |          |  |
|                      |          | 04:01:01:02 | 04:01:01:04 |           |            | 04:01:01:01           | 04:82       |       |                    |          |                     |          |  |

Supplementary Table 3. HLA typing results using exome-seq data and the laboratory validation

| Sample | Gene     | Exome reads |                       |           |            | Laboratory validation |             |       |                    |          |                     |          |
|--------|----------|-------------|-----------------------|-----------|------------|-----------------------|-------------|-------|--------------------|----------|---------------------|----------|
|        |          | ATHLATES    |                       | HLAminer* |            | SBT#                  |             |       | Additional typing‡ |          | Final type assigned |          |
|        |          | Allele 1    | Allele 2              | Alleles   | Confidence | Allele 1              | Allele 2    | Note† | Allele 1           | Allele 2 | Allele 1            | Allele 2 |
|        |          | 04:01:01:02 | 04:01:01:05           |           |            | 04:01:01:02           | 04:01:01:02 |       |                    |          |                     |          |
|        |          | 04:01:01:03 | 04:01:01:03           |           |            | 04:01:01:02           | 04:01:01:03 |       |                    |          |                     |          |
|        |          | 04:01:01:04 | 04:01:01:04           |           |            | 04:01:01:02           | 04:01:01:04 |       |                    |          |                     |          |
|        |          | 04:01:01:03 | 04:01:01:05           |           |            | 04:01:01:02           | 04:01:01:05 |       |                    |          |                     |          |
|        |          | 04:01:01:04 | 04:01:01:04           |           |            | 04:01:01:02           | 04:09N      |       |                    |          |                     |          |
|        |          | 04:01:01:04 | 04:01:01:05           |           |            | 04:01:01:02           | 04:30       | r     |                    |          |                     |          |
|        |          | 04:01:01:05 | 04:01:01:05           |           |            | 04:01:01:02           | 04:82       | r     |                    |          |                     |          |
|        |          |             |                       |           |            | 04:01:01:03           | 04:01:01:03 |       |                    |          |                     |          |
|        |          |             |                       |           |            | 04:01:01:03           | 04:01:01:04 |       |                    |          |                     |          |
|        |          |             |                       |           |            | 04:01:01:03           | 04:01:01:05 |       |                    |          |                     |          |
|        |          |             |                       |           |            | 04:01:01:03           | 04:09N      |       |                    |          |                     |          |
|        |          |             |                       |           |            | 04:01:01:03           | 04:30       | r     |                    |          |                     |          |
|        |          |             |                       |           |            | 04:01:01:03           | 04:82       | r     |                    |          |                     |          |
|        |          |             |                       |           |            | 04:01:01:04           | 04:01:01:04 |       |                    |          |                     |          |
|        |          |             |                       |           |            | 04:01:01:04           | 04:01:01:05 |       |                    |          |                     |          |
|        |          |             |                       |           |            | 04:01:01:04           | 04:09N      |       |                    |          |                     |          |
|        |          |             |                       |           |            | 04:01:01:04           | 04:30       | r     |                    |          |                     |          |
|        |          |             |                       |           |            | 04:01:01:05           | 04:01:01:05 |       |                    |          |                     |          |
|        | HLA-DRB1 | 04:05:01    | 08:04:01 <sup>c</sup> | NR        |            | 04:05:01              | 08:04:02    |       |                    |          | 04:05:01            | 08:04:02 |
|        | HLA-DQB1 | 03:01:04    | 03:02:01              | NR        |            | 03:01:04              | 03:02:01    |       |                    |          | 03:01:04            | 03:02:01 |
|        |          |             |                       |           |            | 03:03:04              | 03:04       | Z     |                    |          |                     |          |

\*HLAminer reports individual HLA alleles with confidence  $\geq 30$ ; no allelic pair is inferred by the program; NR, nothing reported.

#SBT, sequence based typing by Sanger's method. Results after the first round of sequencing are listed.

†r, rare allele in the population; Z, group specific primer (Z primer) available to sequence particular haplotypes; S denotes allelic pairs that do not need to be ruled out. The shaded allelic pairs were ruled out using Z primers during the second round of sequencing.

‡Performed by SSP and/or SSOP methods. SSP, sequence specific primers; SSOP, sequence specific oligonucleotide probes.

<sup>a</sup>A\*11:77 is equally supported and cannot be ruled out.

<sup>b</sup>There is no read support for C\*03:04:21.

<sup>c</sup>There is no read support for DRB1\*08:04:02.

<sup>d</sup>The typing results for NA19240R and NA20313R are not shown. The typing by ATHLATES is completely concordant with NA19240 and NA20313, respectively; the typing by HLAminer does not completely agree with NA19240 and NA20313, respectively.

Supplementary Table 4. A sample report generated by ALHLATES (for HG01757, HLA-DQB1)

| Name             | HD | Aln_len | cDNA_len | Similarity | Avg_cov | Missing Exons (ID, len) ; mismatches [ID, pos] |
|------------------|----|---------|----------|------------|---------|------------------------------------------------|
| DQB1*03:03:02:03 | 0  | 772     | 786      | 1          | 134.253 | (5, 0) (6, 14)                                 |
| DQB1*03:03:02:02 | 0  | 772     | 786      | 1          | 134.253 | (5, 0) (6, 14)                                 |
| DQB1*03:03:02:01 | 0  | 772     | 786      | 1          | 134.253 | (5, 0) (6, 14)                                 |
| DQB1*02:01:01    | 0  | 772     | 786      | 1          | 144.622 | (5, 0) (6, 14)                                 |
| DQB1*02:02       | 1  | 772     | 786      | 0.998705   | 144.622 | (5, 0) (6, 14) [3, 121]                        |
| DQB1*03:02:01    | 1  | 772     | 786      | 0.998705   | 134.253 | (5, 0) (6, 14) [2, 157]                        |
| DQB1*03:31       | 1  | 618     | 618      | 0.998382   | 147.324 | (1, 0) (5, 0) (6, 0) [3, 63]                   |
| DQB1*03:43       | 1  | 552     | 552      | 0.998188   | 154.324 | (1, 0) (4, 0) (5, 0) (6, 0) [3, 141]           |
| DQB1*03:41       | 1  | 552     | 552      | 0.998188   | 154.324 | (1, 0) (4, 0) (5, 0) (6, 0) [2, 120]           |
| DQB1*03:39       | 1  | 552     | 552      | 0.998188   | 154.324 | (1, 0) (4, 0) (5, 0) (6, 0) [3, 98]            |
| DQB1*03:38       | 1  | 552     | 552      | 0.998188   | 154.324 | (1, 0) (4, 0) (5, 0) (6, 0) [2, 75]            |
| DQB1*03:30       | 1  | 552     | 552      | 0.998188   | 154.324 | (1, 0) (4, 0) (5, 0) (6, 0) [2, 13]            |
| DQB1*03:03:04    | 1  | 552     | 552      | 0.998188   | 154.324 | (1, 0) (4, 0) (5, 0) (6, 0) [3, 224]           |
| DQB1*02:01:04    | 1  | 552     | 552      | 0.998188   | 173.219 | (1, 0) (4, 0) (5, 0) (6, 0) [2, 194]           |
| DQB1*02:01:05    | 1  | 552     | 552      | 0.998188   | 173.219 | (1, 0) (4, 0) (5, 0) (6, 0) [2, 206]           |
| DQB1*02:07       | 1  | 552     | 552      | 0.998188   | 173.219 | (1, 0) (4, 0) (5, 0) (6, 0) [2, 229]           |
| DQB1*02:04       | 1  | 552     | 552      | 0.998188   | 173.219 | (1, 0) (4, 0) (5, 0) (6, 0) [3, 123]           |
| DQB1*03:33       | 1  | 522     | 522      | 0.998084   | 149.414 | (1, 0) (4, 0) (5, 0) (6, 0) [3, 156]           |
| DQB1*03:34       | 1  | 522     | 522      | 0.998084   | 149.414 | (1, 0) (4, 0) (5, 0) (6, 0) [2, 45]            |
| DQB1*03:32       | 2  | 552     | 552      | 0.996377   | 154.324 | (1, 0) (4, 0) (5, 0) (6, 0) [2, 157] [3, 138]  |
| DQB1*02:06       | 2  | 552     | 552      | 0.996377   | 173.219 | (1, 0) (4, 0) (5, 0) (6, 0) [3, 121] [3, 225]  |

----- Candidate Allelic Pairs -----

| Name             | HD | Aln_len | cDNA_len | Similarity | Avg_cov | Missing Exons (ID, len) ; mismatches [ID, pos] |
|------------------|----|---------|----------|------------|---------|------------------------------------------------|
| DQB1*03:03:02:03 | 0  | 772     | 786      | 1          | 134.253 | (5, 0) (6, 14)                                 |
| DQB1*03:03:02:02 | 0  | 772     | 786      | 1          | 134.253 | (5, 0) (6, 14)                                 |
| DQB1*03:03:02:01 | 0  | 772     | 786      | 1          | 134.253 | (5, 0) (6, 14)                                 |
| DQB1*02:01:01    | 0  | 772     | 786      | 1          | 144.622 | (5, 0) (6, 14)                                 |

----- Inferred Allelic Pairs -----

|                  |               |   |
|------------------|---------------|---|
| DQB1*03:03:02:03 | DQB1*02:01:01 | 0 |
| DQB1*03:03:02:02 | DQB1*02:01:01 | 0 |
| DQB1*03:03:02:01 | DQB1*02:01:01 | 0 |

HD: Hamming distance.

Aln\_len: alignment length, number of cDNA bases supported by contigs.

cDNA\_len: total length of cDNA of an allele.

Avg\_cov: average coverage for an allele.

Missing Exons (ID, len): ID, the identity of an exon not considered for calculation of Hamming distance; len, length of the indicated exon as documented in the IMGT/HLA database.

mismatches[ID, pos]: the position (pos) of a mismatch in the exon of indicated identity (ID) when compared to its best hit in contigs.



Supplementary Table 5. Statistical analysis of allelic bias within individual exons <sup>a</sup>

| Genes    | Sample                      | Allele pair (1-2)                 | Allele1 - Allele2   |                    |                     |                    |                     |       |                     |                   |                     |       |                     |      |
|----------|-----------------------------|-----------------------------------|---------------------|--------------------|---------------------|--------------------|---------------------|-------|---------------------|-------------------|---------------------|-------|---------------------|------|
|          |                             |                                   | Exon 1              |                    | Exon 2              |                    | Exon 3              |       | Exon 4              |                   | Exon 5              |       | Exon 6              |      |
|          |                             |                                   | Z                   | p                  | Z                   | p                  | Z                   | p     | Z                   | p                 | Z                   | p     | Z                   | p    |
| HLA-A    | HG01756                     | A*30:02:01-A*66:01                |                     |                    | -2.558 <sup>b</sup> | .011               | -3.328 <sup>b</sup> | .001  | -2.803 <sup>b</sup> | .005              | -1.826 <sup>b</sup> | .068  | -1.414 <sup>b</sup> | .157 |
|          | HG01757                     | A*01:01:01:01-A*02:01:01:01       | -1.342 <sup>b</sup> | .180               | -1.872 <sup>b</sup> | .061               | -3.717 <sup>c</sup> | .000  | -2.936 <sup>b</sup> | .003              | -1.604 <sup>b</sup> | .109  | -1.414 <sup>c</sup> | .157 |
|          | HG01872                     | A*11:02:01-A*24:07                | -.447 <sup>c</sup>  | .655               | -3.012 <sup>b</sup> | .003               | -.094 <sup>b</sup>  | .925  | -2.023 <sup>b</sup> | .043              | -2.032 <sup>c</sup> | .042  | -1.414 <sup>b</sup> | .157 |
|          | HG01873                     | A*02:03:01-A*03:01:01:01          | -1.342 <sup>c</sup> | .180               | -.530 <sup>c</sup>  | .596               | -3.298 <sup>b</sup> | .001  | -2.934 <sup>c</sup> | .003              | -1.604 <sup>c</sup> | .109  | -1.342 <sup>b</sup> | .157 |
|          | HG01886                     | A*30:02:01-A*74:01                | -1.000 <sup>b</sup> | .317               | -2.809 <sup>b</sup> | .005               | -2.807 <sup>b</sup> | .005  | -2.803 <sup>b</sup> | .005              | -2.521 <sup>b</sup> | .012  | -1.414 <sup>b</sup> | .157 |
|          | HG01953                     | A*02:01:01:01-A*02:11:01          |                     |                    | -1.342 <sup>b</sup> | .180               |                     |       |                     |                   |                     |       |                     |      |
|          | HG01968                     | A*02:01:01:01-A*68:01:02          |                     |                    | -2.936 <sup>c</sup> | .003               | -1.275 <sup>b</sup> | .202  |                     |                   |                     |       |                     |      |
|          | HG02014                     | A*02:01:01:01-A*36:01             | -1.342 <sup>c</sup> | .180               | -2.941 <sup>c</sup> | .003               | -3.523 <sup>b</sup> | .000  | -2.937 <sup>c</sup> | .003              | -1.604 <sup>c</sup> | .109  | -1.414 <sup>c</sup> | .157 |
|          | HG02057                     | A*02:03:01-A*31:01:02             | -1.633 <sup>c</sup> | .102               | -1.966 <sup>c</sup> | .049               | -1.351 <sup>c</sup> | .177  | -1.992 <sup>c</sup> | .046              | -.365 <sup>b</sup>  | .715  |                     |      |
|          | NA18507                     | A*23:01:01-A*30:01:01             | -1.342 <sup>c</sup> | .180               | -3.749 <sup>c</sup> | .000               | -.255 <sup>c</sup>  | .798  | -2.023 <sup>c</sup> | .043              | -1.572 <sup>c</sup> | .116  | -1.414 <sup>b</sup> | .157 |
|          | NA19129                     | A*02:02-A*23:01:01                | -1.342 <sup>c</sup> | .180               | -3.531 <sup>b</sup> | .000               | -3.063 <sup>c</sup> | .002  | -3.518 <sup>c</sup> | .000              | -2.032 <sup>b</sup> | .042  |                     |      |
|          | NA19240                     | A*30:01:01-A*68:02:01:01          |                     |                    | -2.936 <sup>b</sup> | .003               | -3.519 <sup>b</sup> | .000  | -2.981 <sup>b</sup> | .003              | -1.604 <sup>c</sup> | .109  | -1.342 <sup>c</sup> | .180 |
|          | NA19240R                    | A*30:01:01-A*68:02:01:01          |                     |                    | -1.808 <sup>b</sup> | .071               | -3.520 <sup>b</sup> | .000  | -2.904 <sup>b</sup> | .004              | -1.604 <sup>c</sup> | .109  | -1.342 <sup>c</sup> | .180 |
|          | NA20313                     | A*03:01:01:01-A*68:02:01:01       |                     |                    | -2.207 <sup>b</sup> | .027               | -3.182 <sup>c</sup> | .001  | -3.059 <sup>b</sup> | .002              | -1.604 <sup>c</sup> | .109  | -1.414 <sup>c</sup> | .157 |
|          | NA20313R                    | A*03:01:01:01-A*68:02:01:01       |                     |                    | -2.201 <sup>c</sup> | .028               | -3.189 <sup>c</sup> | .001  | -3.061 <sup>b</sup> | .002              | -1.604 <sup>c</sup> | .109  | -1.342 <sup>c</sup> | .180 |
| HLA-B    | HG01756                     | B*18:01:01:01-B*41:02:01          | -.850 <sup>b</sup>  | .395               | -3.296 <sup>b</sup> | .001               | -2.606 <sup>b</sup> | .009  | -.447 <sup>c</sup>  | .655              | .000 <sup>d</sup>   | 1.000 |                     |      |
|          | HG01757                     | B*18:01:01:01-B*57:01:01          | -1.604 <sup>b</sup> | .109               | -3.260 <sup>b</sup> | .001               | -1.844 <sup>b</sup> | .065  |                     |                   | -1.604 <sup>c</sup> | .109  |                     |      |
|          | HG01872                     | B*27:04:01-B*39:05:01             | -2.536 <sup>b</sup> | .011               | -3.301 <sup>c</sup> | .001               | -3.299 <sup>b</sup> | .001  | -.552 <sup>b</sup>  | .581              | -.447 <sup>b</sup>  | .655  |                     |      |
|          | HG01873                     | B*35:03:01-B*55:02:01             | -1.826 <sup>b</sup> | .068               | -3.062 <sup>b</sup> | .002               | -2.949 <sup>b</sup> | .003  |                     |                   |                     |       |                     |      |
|          | HG01886                     | B*15:03:01-B*57:03:01             | -2.032 <sup>b</sup> | .042               | -4.376 <sup>b</sup> | .000               | -2.521 <sup>b</sup> | .012  |                     |                   | -1.604 <sup>c</sup> | .109  |                     |      |
|          | HG01953                     | B*15:04-B*35:05:01                | -1.890 <sup>b</sup> | .059               | -.966 <sup>c</sup>  | .334               | -3.186 <sup>c</sup> | .001  | -1.069 <sup>c</sup> | .285              |                     |       |                     |      |
|          | HG01968                     | B*07:02:01-B*40:02:01             | -2.524 <sup>b</sup> | .012               | -3.625 <sup>b</sup> | .000               | -.211 <sup>c</sup>  | .833  |                     |                   |                     |       |                     |      |
|          | HG02014                     | B*35:01:01:01-B*40:01:02          | -2.032 <sup>b</sup> | .042               | -2.936 <sup>b</sup> | .003               | -.119 <sup>b</sup>  | .906  | -1.342 <sup>b</sup> | .180              | -1.826 <sup>c</sup> | .068  |                     |      |
|          | HG02057                     | B*13:01:01-B*48:01:01             | -2.264 <sup>b</sup> | .024               | -3.727 <sup>c</sup> | .000               | -2.416 <sup>b</sup> | .016  | -1.342 <sup>b</sup> | .180              | -1.342 <sup>b</sup> | .180  |                     |      |
|          | NA18507                     | B*15:03:01-B*42:01:01             | -1.841 <sup>c</sup> | .066               | -2.675 <sup>c</sup> | .007               | -2.515 <sup>c</sup> | .012  | -.447 <sup>c</sup>  | .655              | -1.604 <sup>b</sup> | .109  |                     |      |
|          | NA19129                     | B*07:02:01-B*58:01:01             | -.322 <sup>c</sup>  | .748               | -4.546 <sup>b</sup> | .000               | -2.305 <sup>b</sup> | .021  | -1.342 <sup>b</sup> | .180              | -1.826 <sup>b</sup> | .068  |                     |      |
|          | NA19240                     | B*35:01:01:01-B*57:03:01          |                     |                    | -3.064 <sup>b</sup> | .002               | -2.371 <sup>b</sup> | .018  | -.365 <sup>b</sup>  | .715              | -1.604 <sup>c</sup> | .109  |                     |      |
|          | NA19240R                    | B*35:01:01:01-B*57:03:01          |                     |                    | -3.929 <sup>b</sup> | .000               | -2.205 <sup>b</sup> | .027  | -1.461 <sup>b</sup> | .144              | -.535 <sup>b</sup>  | .593  |                     |      |
|          | NA20313                     | B*35:01:01:01-B*53:01:01          |                     |                    | -2.214 <sup>b</sup> | .027               |                     |       |                     |                   |                     |       |                     |      |
|          | NA20313R                    | B*35:01:01:01-B*53:01:01          |                     |                    | -2.214 <sup>b</sup> | .027               |                     |       |                     |                   |                     |       |                     |      |
| HLA-C    | HG01756                     | C*05:01:01:01-C*17:01:01:01       | -.677 <sup>b</sup>  | .498               | -1.604 <sup>b</sup> | .109               | -.118 <sup>c</sup>  | .906  | -1.362 <sup>c</sup> | .173              | -2.133 <sup>c</sup> | .033  |                     |      |
|          | HG01872                     | C*08:01:01-C*12:02:02             |                     |                    | .000 <sup>d</sup>   | 1.000              | -2.807 <sup>b</sup> | .005  |                     |                   |                     |       |                     |      |
|          | HG01873                     | C*04:01:01:01-C*12:03:01:01       |                     |                    | -.238 <sup>b</sup>  | .812               | -2.103 <sup>b</sup> | .035  | -2.023 <sup>c</sup> | .043              | -.535 <sup>b</sup>  | .593  |                     |      |
|          | HG01886                     | C*02:10-C*07:01:02                | -1.342 <sup>b</sup> | .180               | -2.936 <sup>b</sup> | .003               | .000 <sup>d</sup>   | 1.000 | -2.936 <sup>c</sup> | .003              | -2.675 <sup>c</sup> | .007  | -.447 <sup>c</sup>  | .655 |
|          | HG01953                     | C*01:02:01-C*04:01:01:01          |                     |                    | -3.061 <sup>b</sup> | .002               | -1.947 <sup>b</sup> | .051  | -1.604 <sup>b</sup> | .109              |                     |       |                     |      |
|          | HG01968                     | C*03:04:01:01-C*07:02:01:01       | -1.841 <sup>b</sup> | .066               | -.674 <sup>c</sup>  | .500               | -2.513 <sup>c</sup> | .012  | -3.059 <sup>c</sup> | .002              | -.178 <sup>c</sup>  | .859  | -1.342 <sup>c</sup> | .180 |
|          | HG02014                     | C*03:04:01:01-C*04:01:01:01       |                     |                    | -3.101 <sup>c</sup> | .002               | -3.066 <sup>c</sup> | .002  | -1.069 <sup>b</sup> | .285              |                     |       |                     |      |
|          | HG02057                     | C*03:03:01-C*03:04:04             |                     |                    | -1.342 <sup>c</sup> | .180               |                     |       |                     |                   |                     |       |                     |      |
|          | NA18507                     | C*02:10-C*17:01:01:01             | -1.841 <sup>c</sup> | .066               | -2.023 <sup>c</sup> | .043               | -1.512 <sup>c</sup> | .130  | -.140 <sup>c</sup>  | .889              | -1.604 <sup>c</sup> | .109  |                     |      |
|          | NA19240                     | C*04:01:01:01-C*18:02             | -1.841 <sup>b</sup> | .066               | -2.823 <sup>b</sup> | .005               |                     |       |                     |                   |                     |       |                     |      |
|          | NA19240R                    | C*04:01:01:01-C*18:02             | -1.826 <sup>b</sup> | .068               | -2.552 <sup>b</sup> | .011               |                     |       |                     |                   |                     |       |                     |      |
| HLA-DRB1 | HG01757                     | DRB1*03:01:01:01-DRB1*07:01:01:01 | -1.826 <sup>c</sup> | .068               | -1.090 <sup>c</sup> | .276               | -.734 <sup>b</sup>  | .463  |                     |                   |                     |       |                     |      |
|          | HG01872                     | DRB1*08:03:02-DRB1*12:02:01       |                     |                    | -3.921 <sup>b</sup> | .000               |                     |       |                     | .000 <sup>d</sup> | 1.000               |       |                     |      |
|          | HG01873                     | DRB1*08:02:01-DRB1*14:05:01       |                     |                    | -2.657 <sup>b</sup> | .008               |                     |       |                     |                   |                     |       |                     |      |
|          | HG01886                     | DRB1*11:01:02-DRB1*13:02:01       |                     |                    | -1.129 <sup>c</sup> | .259               |                     |       |                     |                   |                     |       |                     |      |
|          | HG01953                     | DRB1*04:11:01-DRB1*09:01:02       | -1.342 <sup>b</sup> | .180               | -3.232 <sup>b</sup> | .001               | -.178 <sup>c</sup>  | .859  |                     |                   |                     |       |                     |      |
|          | HG01968                     | DRB1*01:03-DRB1*09:01:02          | -1.604 <sup>b</sup> | .109               | -4.626 <sup>b</sup> | .000               | -1.683 <sup>c</sup> | .092  |                     |                   |                     |       |                     |      |
|          | HG02014                     | DRB1*01:01:01-DRB1*15:01:01:01    |                     |                    | -3.826 <sup>b</sup> | .000               | -2.703 <sup>b</sup> | .007  |                     |                   |                     |       |                     |      |
|          | HG02057                     | DRB1*11:01:01-DRB1*13:12:01       |                     |                    | -2.371 <sup>b</sup> | .018               |                     |       |                     |                   |                     |       |                     |      |
|          | NA18507                     | DRB1*08:04:01-DRB1*13:02:01       |                     |                    | -2.920 <sup>c</sup> | .004               |                     |       |                     |                   |                     |       |                     |      |
|          | NA19129                     | DRB1*01:01:01-DRB1*11:02:01       |                     |                    | -3.137 <sup>b</sup> | .002               | -1.073 <sup>b</sup> | .283  |                     |                   |                     |       |                     |      |
|          | NA19240                     | DRB1*12:01:01-DRB1*16:02:01       | -1.761 <sup>b</sup> | .078               | -4.459 <sup>c</sup> | .000               | -2.134 <sup>c</sup> | .033  |                     |                   |                     |       |                     |      |
|          | NA19240R                    | DRB1*12:01:01-DRB1*16:02:01       | -.674 <sup>c</sup>  | .500               | -4.458 <sup>c</sup> | .000               | -2.240 <sup>c</sup> | .025  |                     |                   |                     |       |                     |      |
|          | NA20313                     | DRB1*04:05:01-DRB1*08:04:01       |                     |                    | -.337 <sup>c</sup>  | .736               | -.474 <sup>c</sup>  | .635  |                     |                   |                     |       |                     |      |
| NA20313R | DRB1*04:05:01-DRB1*08:04:01 |                                   |                     | -.644 <sup>b</sup> | .520                | -.652 <sup>c</sup> | .515                |       |                     |                   |                     |       |                     |      |
| HLA-DQB1 | HG01757                     | DQB1*02:01:01-DQB1*03:03:02:01    | -2.023 <sup>c</sup> | .043               | -3.138 <sup>b</sup> | .002               | -1.214 <sup>c</sup> | .225  | -1.342 <sup>c</sup> | .180              |                     |       |                     |      |

Supplementary Table 5. Statistical analysis of allelic bias within individual exons <sup>a</sup>

| Genes | Sample   | Allele pair (1-2)                 | Allele1 - Allele2   |      |                     |      |                     |      |                     |      |        |   |        |   |  |  |  |
|-------|----------|-----------------------------------|---------------------|------|---------------------|------|---------------------|------|---------------------|------|--------|---|--------|---|--|--|--|
|       |          |                                   | Exon 1              |      | Exon 2              |      | Exon 3              |      | Exon 4              |      | Exon 5 |   | Exon 6 |   |  |  |  |
|       |          |                                   | Z                   | p    | Z                   | p    | Z                   | p    | Z                   | p    | Z      | p | Z      | p |  |  |  |
| DQB1  | HG01872  | DQB1*06:01:01-DQB1*03:01:01:01    | -1.365 <sup>c</sup> | .715 | -4.108 <sup>b</sup> | .000 | -1.135 <sup>c</sup> | .893 | -2.023 <sup>b</sup> | .043 |        |   |        |   |  |  |  |
|       | HG01873  | DQB1*04:02:01-DQB1*05:03:01:01    | -1.077 <sup>b</sup> | .282 | -4.458 <sup>c</sup> | .000 | -1.956 <sup>b</sup> | .050 | -2.366 <sup>c</sup> | .018 |        |   |        |   |  |  |  |
|       | HG01886  | DQB1*05:02:01-DQB1*06:09          | -1.841 <sup>c</sup> | .066 | -3.724 <sup>c</sup> | .000 | -2.366 <sup>c</sup> | .018 | -1.342 <sup>c</sup> | .180 |        |   |        |   |  |  |  |
|       | HG01968  | DQB1*03:03:02:01-DQB1*05:01:01:01 | -2.673 <sup>c</sup> | .008 | -4.763 <sup>c</sup> | .000 | -.445 <sup>b</sup>  | .656 | -1.992 <sup>c</sup> | .046 |        |   |        |   |  |  |  |
|       | HG02014  | DQB1*05:01:01:01-DQB1*06:02:01    | -1.841 <sup>c</sup> | .066 | -3.221 <sup>b</sup> | .001 | -2.023 <sup>c</sup> | .043 | -1.342 <sup>b</sup> | .180 |        |   |        |   |  |  |  |
|       | NA18507  | DQB1*03:01:04-DQB1*06:09          |                     |      | -3.982 <sup>c</sup> | .000 | -1.836 <sup>c</sup> | .066 |                     |      |        |   |        |   |  |  |  |
|       | NA19129  | DQB1*03:19-DQB1*05:01:01:01       |                     |      | -4.369 <sup>c</sup> | .000 | -1.957 <sup>c</sup> | .050 |                     |      |        |   |        |   |  |  |  |
|       | NA19240  | DQB1*03:01:01:01-DQB1*05:02:01    | -1.367 <sup>c</sup> | .172 | -2.853 <sup>c</sup> | .004 | -2.401 <sup>b</sup> | .016 | -2.527 <sup>c</sup> | .012 |        |   |        |   |  |  |  |
|       | NA19240R | DQB1*03:01:01:01-DQB1*05:02:01    | -2.677 <sup>c</sup> | .007 | -2.779 <sup>c</sup> | .005 | -2.223 <sup>b</sup> | .026 | -2.524 <sup>c</sup> | .012 |        |   |        |   |  |  |  |
|       | NA20313  | DQB1*03:01:04-DQB1*03:02:01       |                     |      | -2.201 <sup>c</sup> | .028 | -1.826 <sup>c</sup> | .068 |                     |      |        |   |        |   |  |  |  |
|       | NA20313R | DQB1*03:01:04-DQB1*03:02:01       |                     |      | -2.201 <sup>c</sup> | .028 | -1.826 <sup>c</sup> | .068 |                     |      |        |   |        |   |  |  |  |

<sup>a</sup>Wilcoxon Signed Ranks Test was performed to compare fold coverages of heterozygous alleles at positions where they differ within each exon; p values lower than 0.05 are shaded in red, with the smallest value shaded with the darkest red; homozygous cases are omitted. <sup>b</sup>Allele1 has higher coverage (based on negative ranks). <sup>c</sup>Allele2 has higher coverage (based on positive ranks). <sup>d</sup>The sum of negative ranks equals the sum of positive ranks.

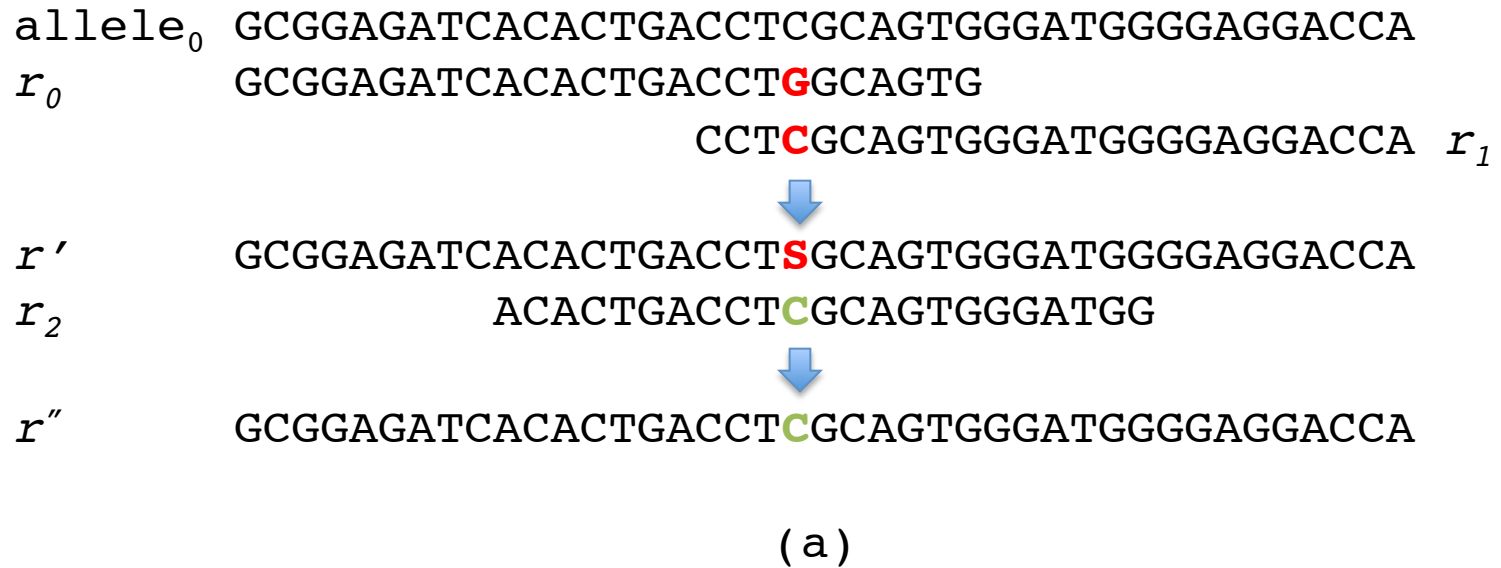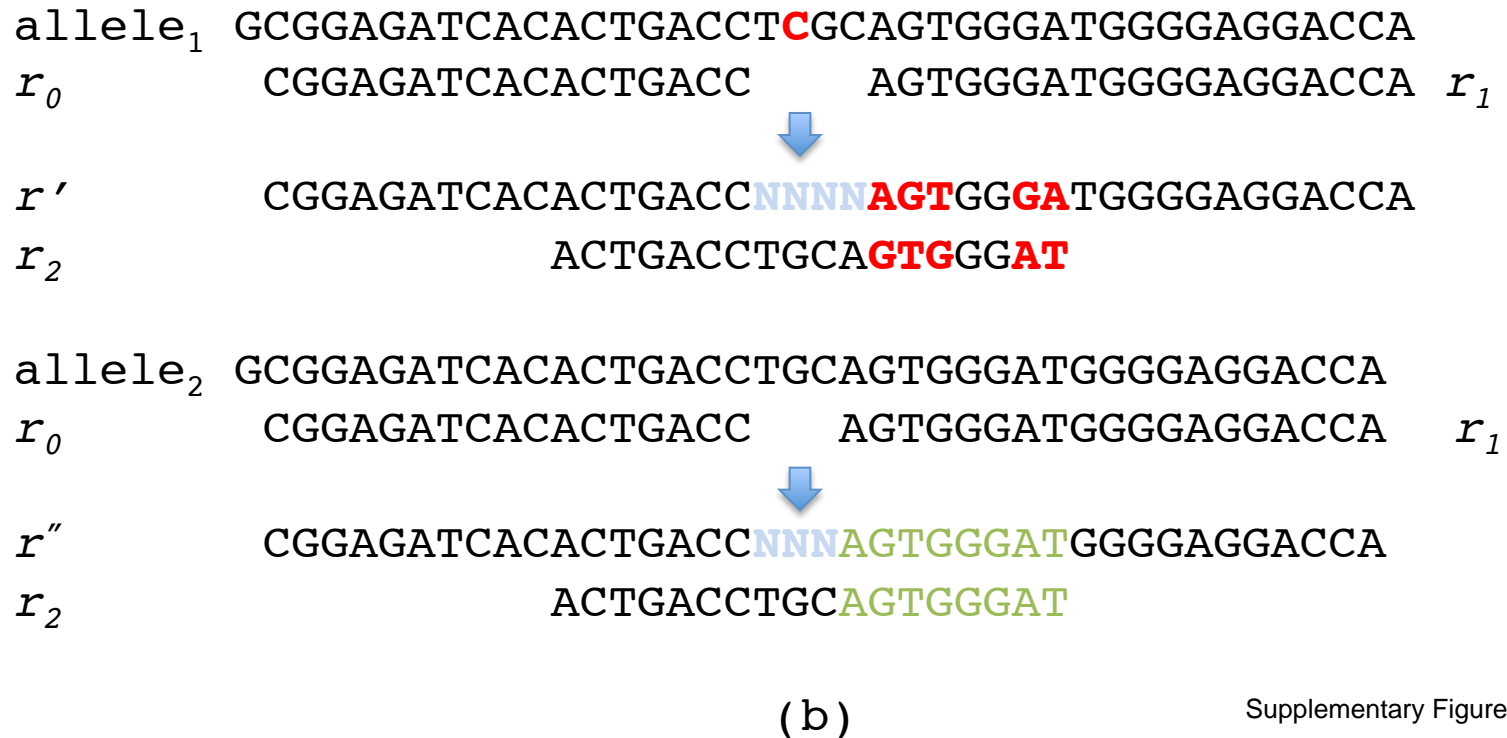

A\*02:01:01:01 GCTCTCACTCCATGAGGTATTTCTTCACATCCGTGTCCCGGCCCGGCCGCGGGGAGCCCCGCTTCATCGCAGTGGGCT  
A\*02:11:01 GCTCTCACTCCATGAGGTATTTCTTCACATCCGTGTCCCGGCCCGGCCGCGGGGAGCCCCGCTTCATCGCAGTGGGCT  
Contig *i* GCTCTCACTCCATGAGGTATTTCTTCACATCCGTGTCCCGGCCCGGCCGCGGGGAGCCCCGCTTCATCGCAGTGGGCT  
Contig *j* GCTCTCACTCCATGAGGTATTTCTTCACATCCGTGTCCCGGCCCGGCCGCGGGGAGCCCCGCTTCATCGCAGTGGGCT

A\*02:01:01:01 ACGTGGACGACACGCAGTTCGTGCGGTTTCGACAGCGACGCCGCGAGCCAGAGGATGGAGCCGCGGGCGCCGTGGATAG  
A\*02:11:01 ACGTGGACGACACGCAGTTCGTGCGGTTTCGACAGCGACGCCGCGAGCCAGAGGATGGAGCCGCGGGCGCCGTGGATAG  
Contig *i* ACGTGGACGACACGCAGTTCGTGCGGTTTCGACAGCGACGCCGCGAGCCAGAGGATGGAGCCGCGGGCGCCGTGGATAG  
Contig *j* ACGTGGACGACACGCAGTTCGTGCGGTTTCGACAGCGACGCCGCGAGCCAGAGGATGGAGCCGCGGGCGCCGTGGATAG

A\*02:01:01:01 AGCAGGAGGGTCCGGAGTATTGGGACGGGGAGACACGGAAAGTGAAGGCCCACTCACAGACTCACAGACTCACCGAGTGGACCTGG  
A\*02:11:01 AGCAGGAGGGTCCGGAGTATTGGGACGGGGAGACACGGAAAGTGAAGGCCCACTCACAGACTCACAGACTCACCGAGTGGACCTGG  
Contig *i* AGCAGGAGGGTCCGGAGTATTGGGACGGGGAGACACGGAAAGTGAAGGCCCACTCACAGACTCACCGAGTGGACCTGG  
Contig *j* AGCAGGAGGGTCCGGAGTATTGGGACGGGGAGACACGGAAAGTGAAGGCCCACTCACAGATTGACCGAGTGGACCTGG

A\*02:01:01:01 GGACCCTGCGCGGCTACTACAACCAGAGCGAGGCCG  
A\*02:11:01 GGACCCTGCGCGGCTACTACAACCAGAGCGAGGCCG  
Contig *i* GGACCCTGCGCGGCTACTACAACCAGAGCGAGGCCG  
Contig *j* GGACCCTGCGCGGCT-----

( a )

C\*04:01:01:01 CCA**G**CAACAGTGCCCAGGGCTCTGATGAGTCTCTCATCGCTTGTAAG  
A\*04:30 CCA**C**CAACAGTGCCCAGGGCTCTGATGAGTCTCTCATCGCTTGTAAG  
Contig *i* CCAGCAACAGTGCCCAGGGCTCTGATGAGTCTCTCATCGCTTGTAAG

( b )

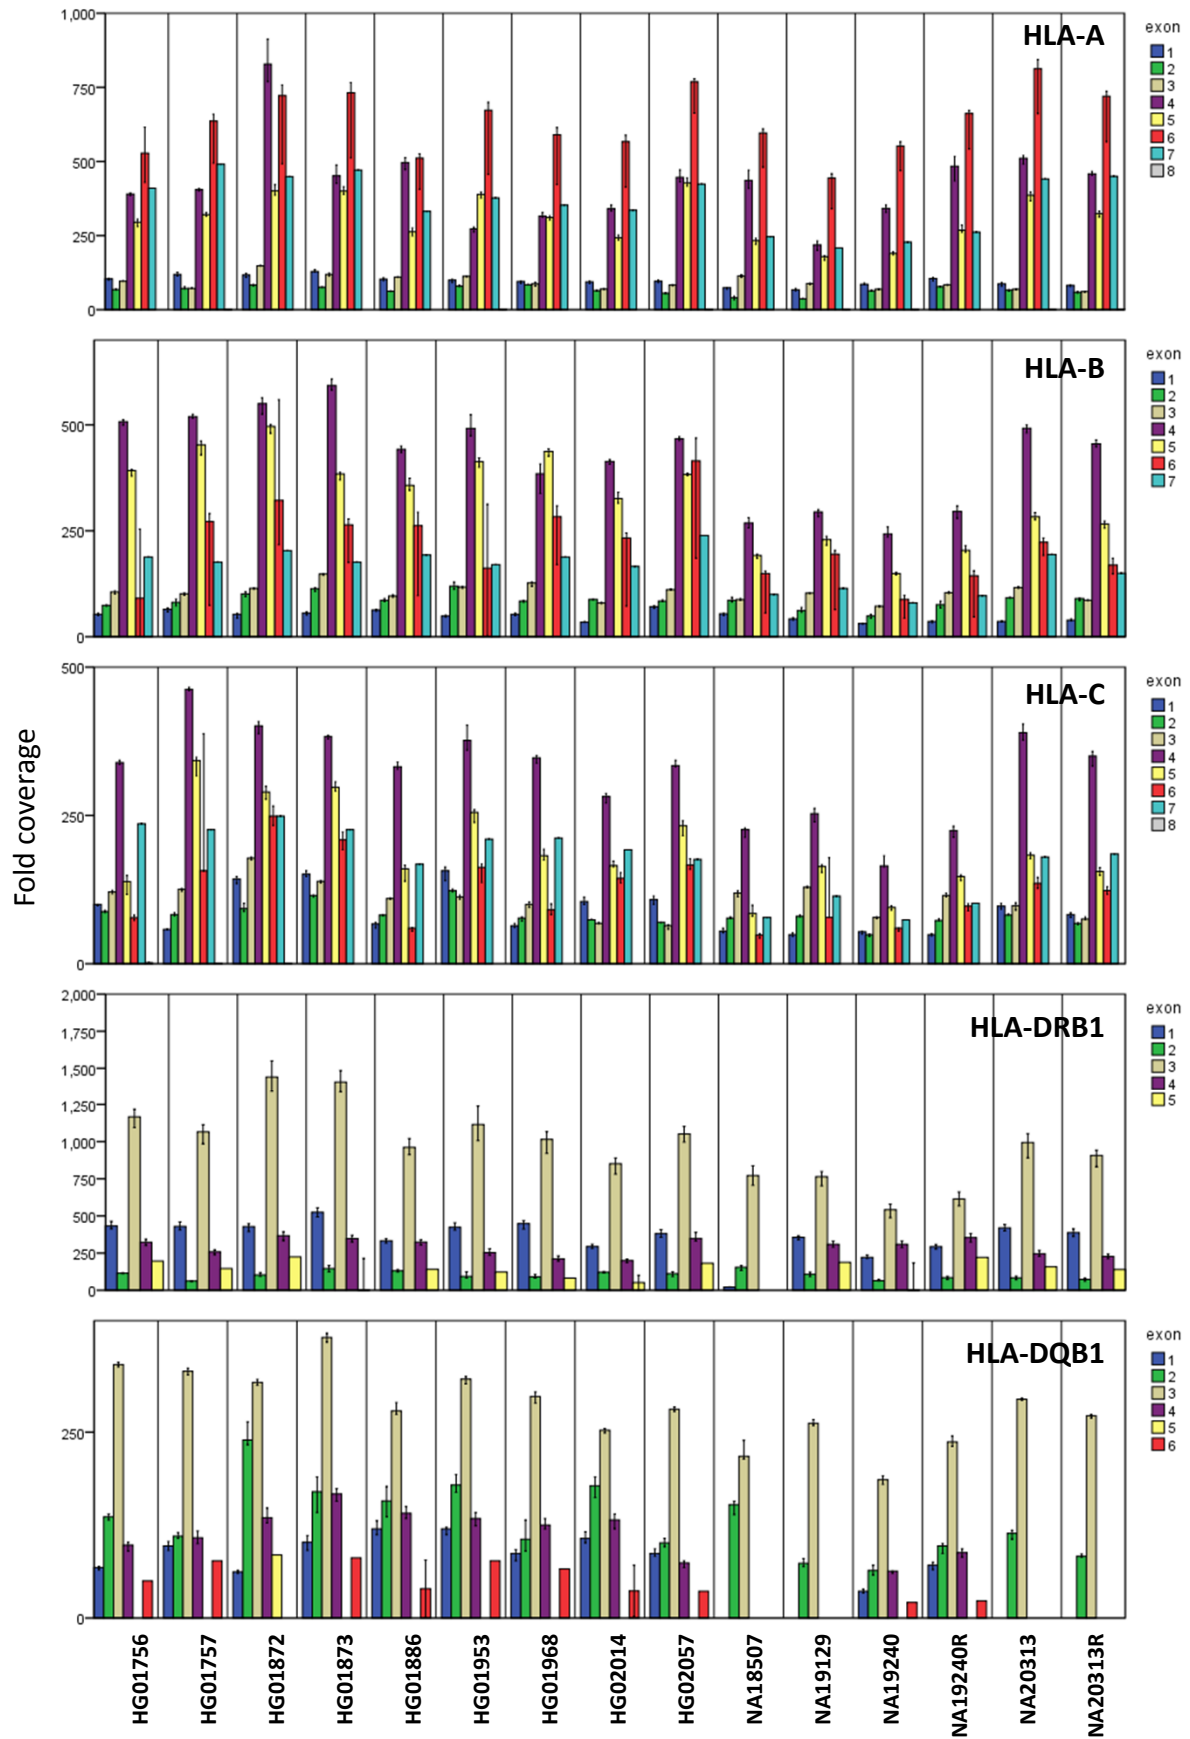

Supplementary Figure 3

allele<sub>0</sub> GCGGAGATCACACTGACCTCGCAGTGGGATGGGGAGGACCA  
allele<sub>1</sub> GCGGAGATCACACTGACCTGGCAGTGGGATGGGGAGGACCA

Contig<sub>a</sub> GCGGAGATCACACTGACCTCGCAGTGGGATGGGGAGGACCA  
Contig<sub>b</sub> GCGGAGATCACACTGACCNNNCAGTGGGATGGGGAGGACCA

( a )

| Candidate Alleles | Exon1 | Exon2 | Exon3 | Exon4 |
|-------------------|-------|-------|-------|-------|
| B*55:02:01        | A     | A     | A     | A     |
| B*56:11           | A     | A     | B     | A     |
| B*35:03:01        | B     | B     | B     | B     |
| B*35:60           | B     | B     | A     | A     |

( b )

**HLA-A**

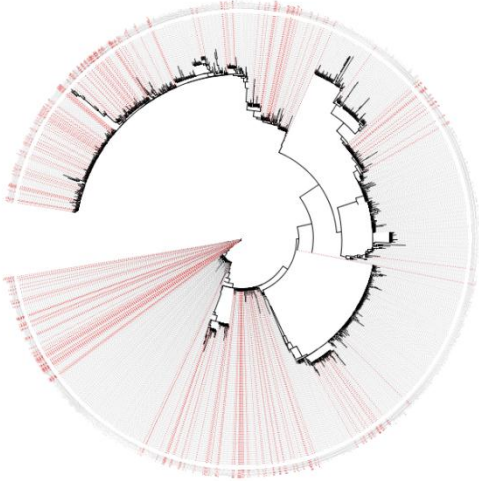

**HLA-B**

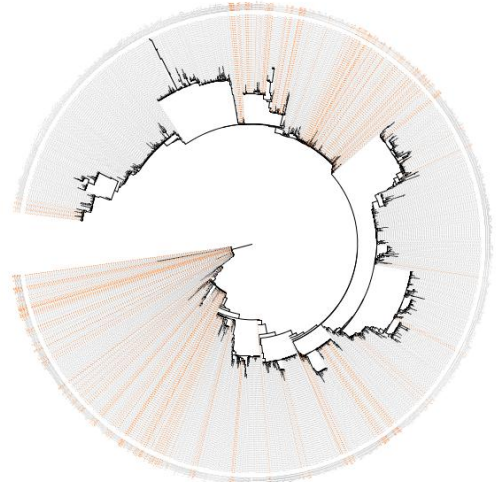

**HLA-C**

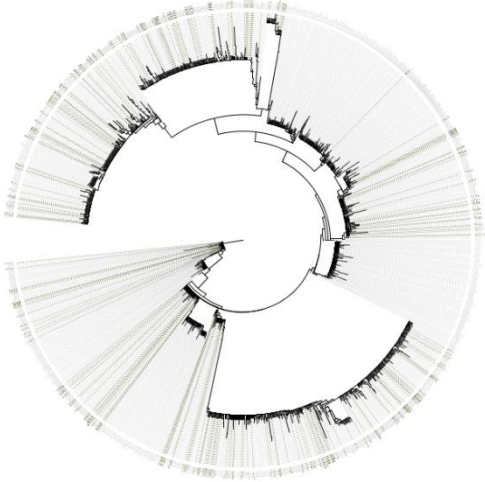

**HLA-DRB1**

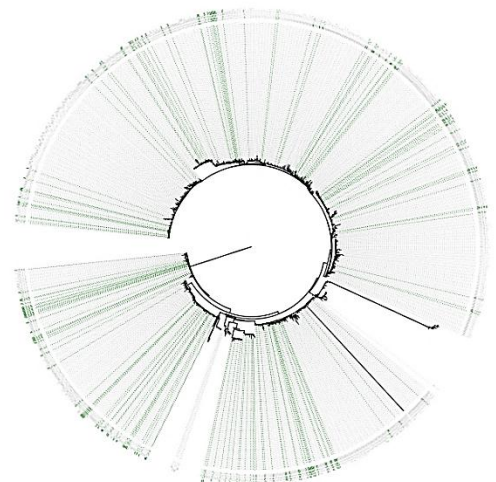

**HLA-DQB1**

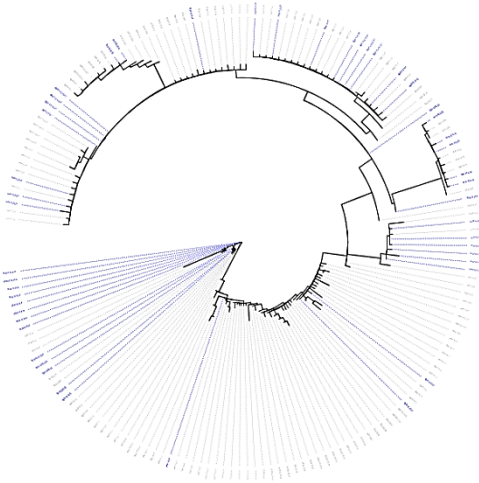

A\*24:02:01:01 (1098bp)

B\*18:01:01:01 (1089bp)

C\*03:02:01 (1101bp)

DRB1\*03:01:01:01 (801bp)

DQB1\*02:01:01 (786bp)

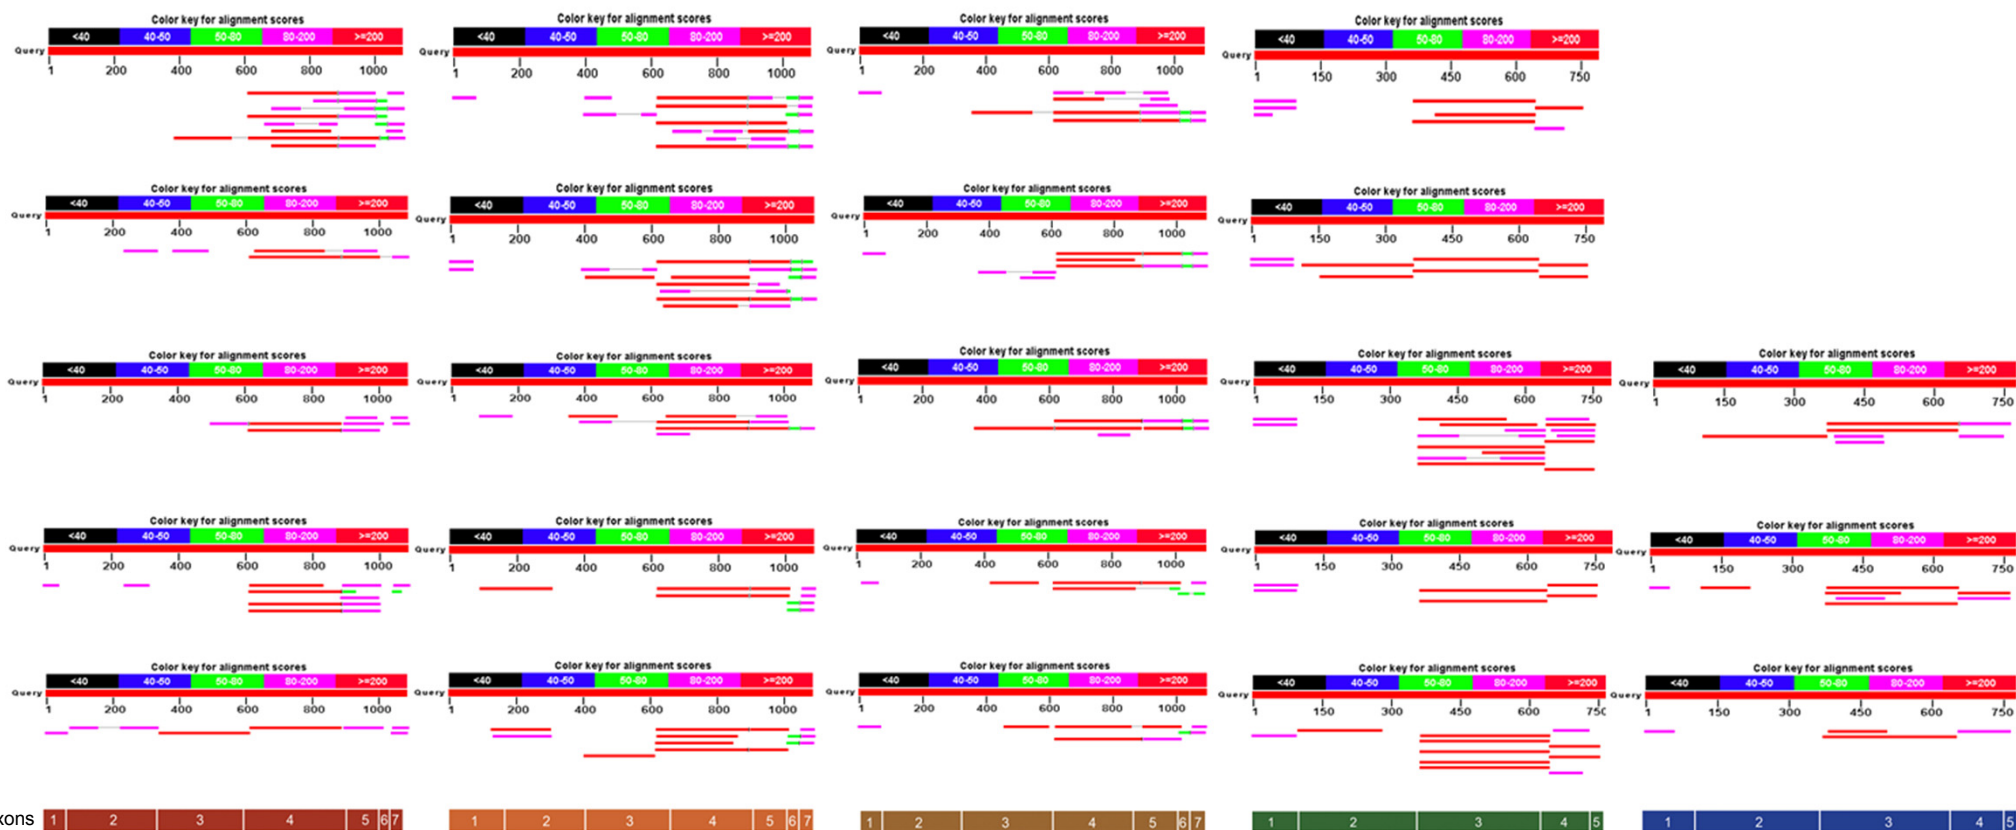



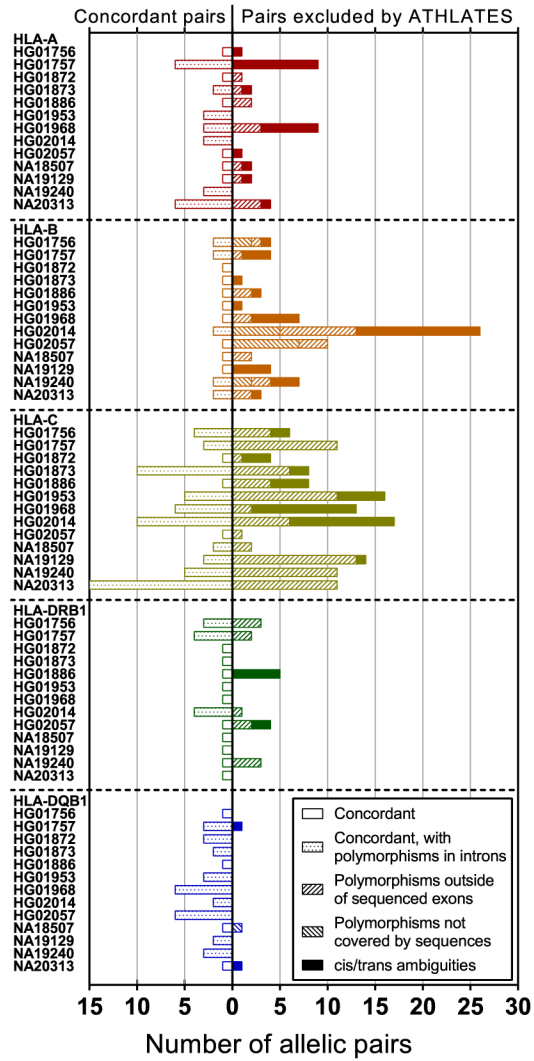

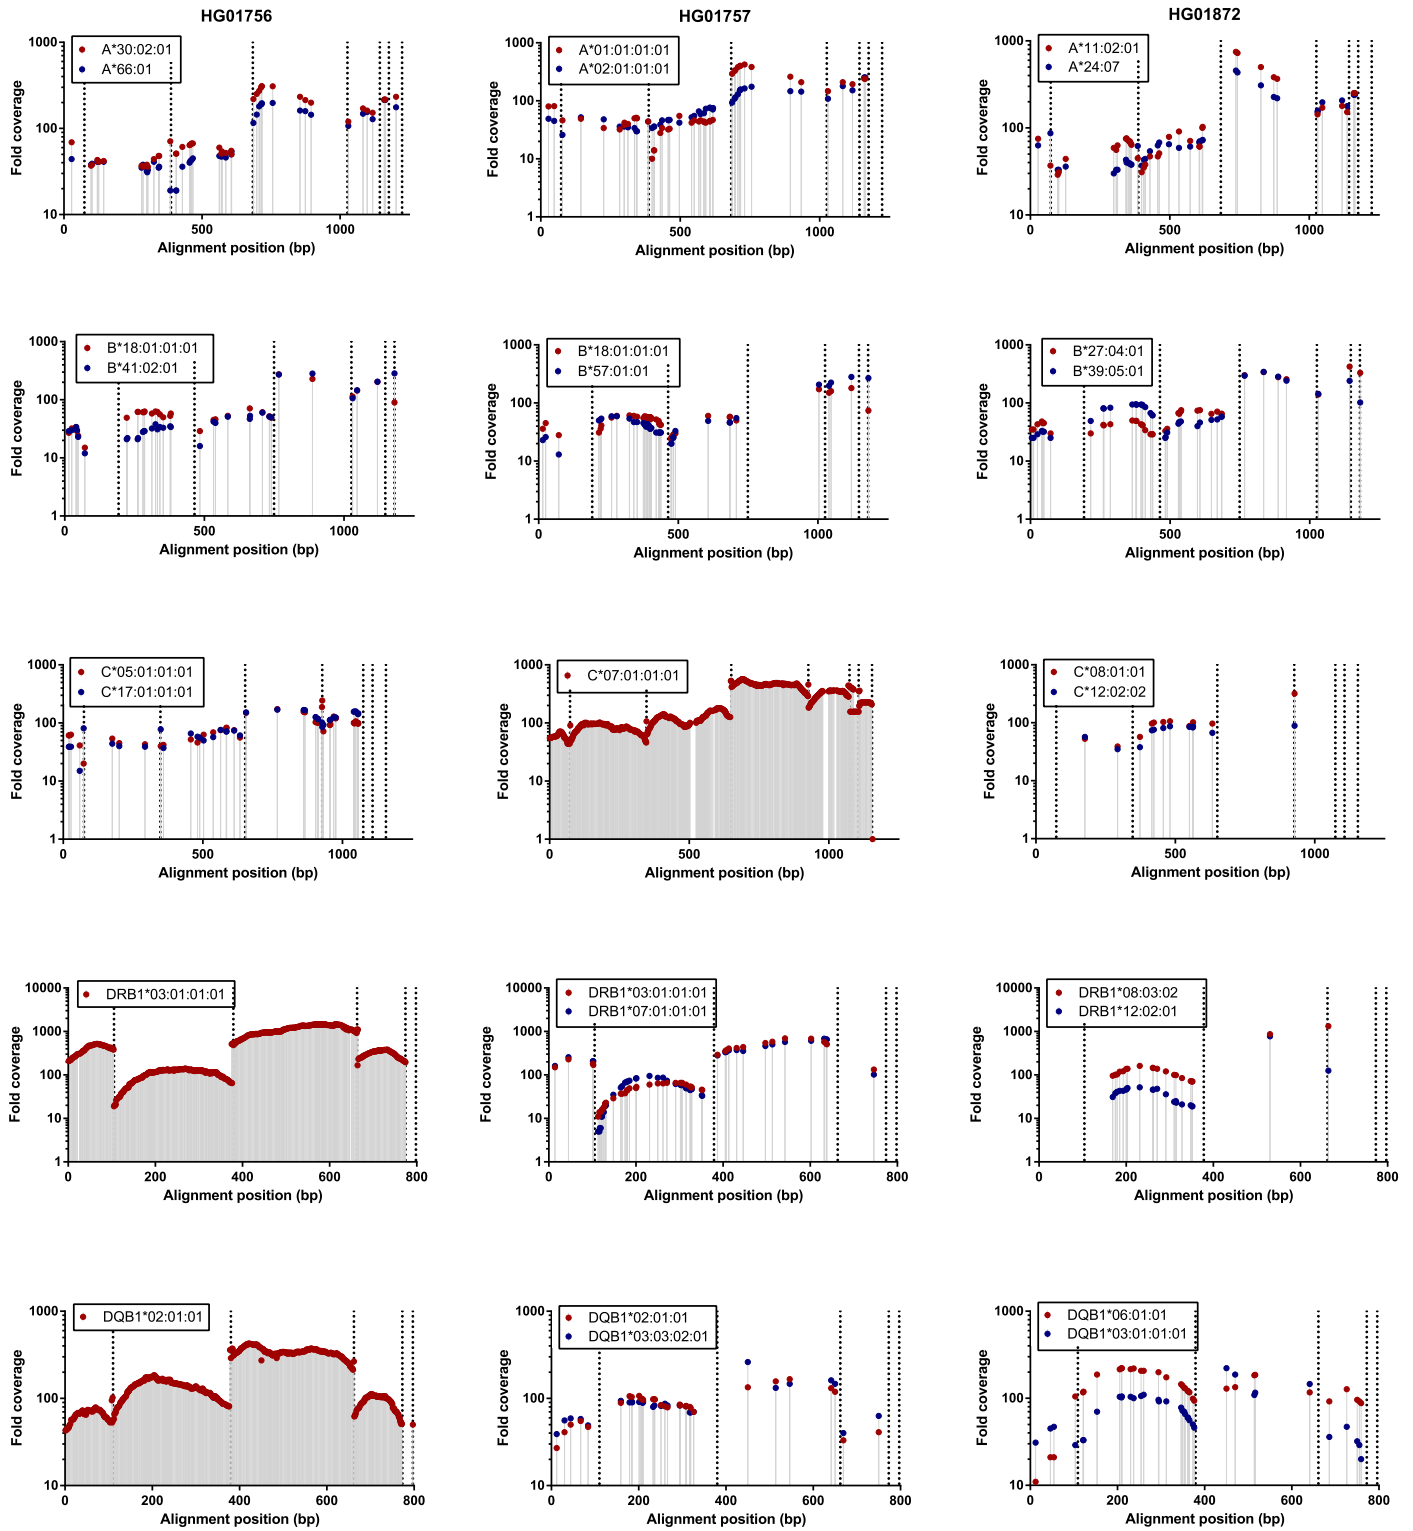

Supplementary Figure 8

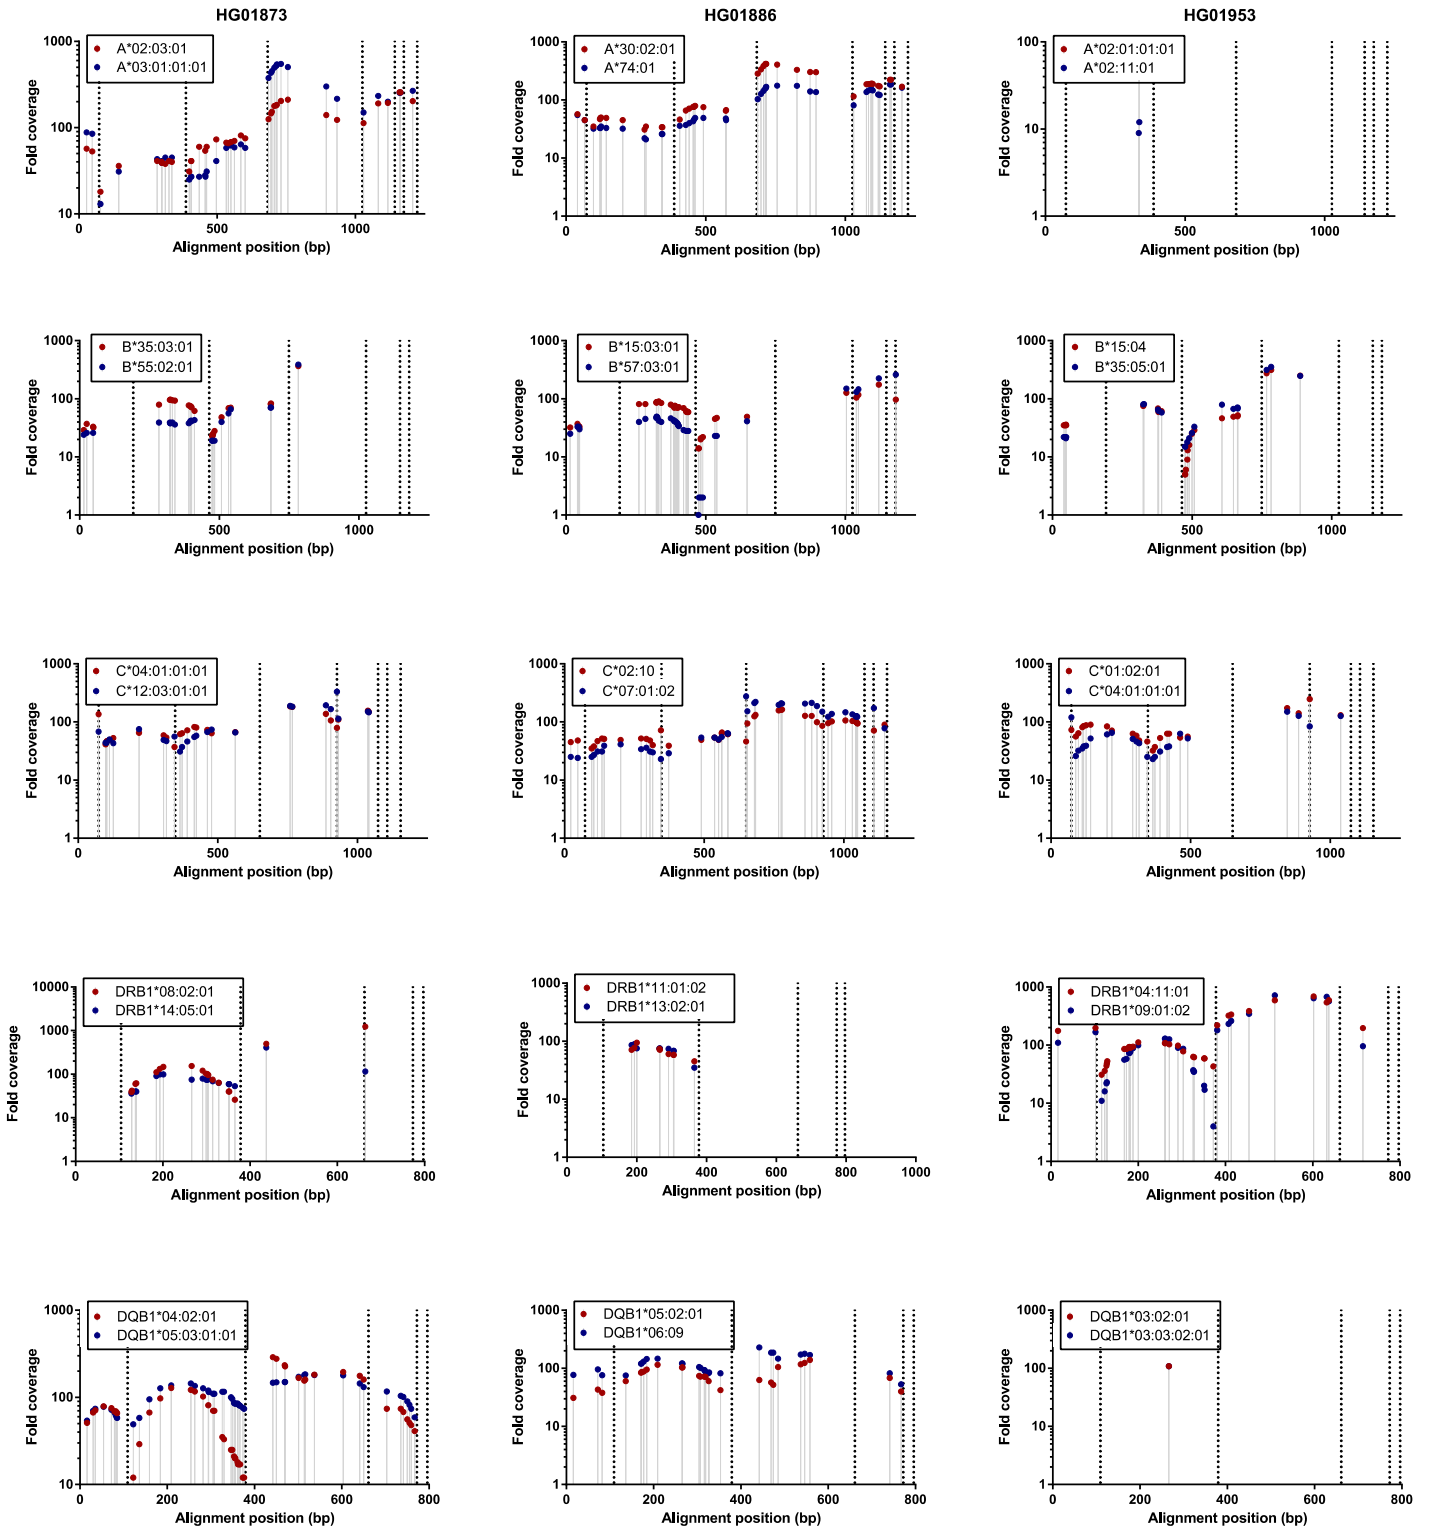

Supplementary Figure 8 (continued)

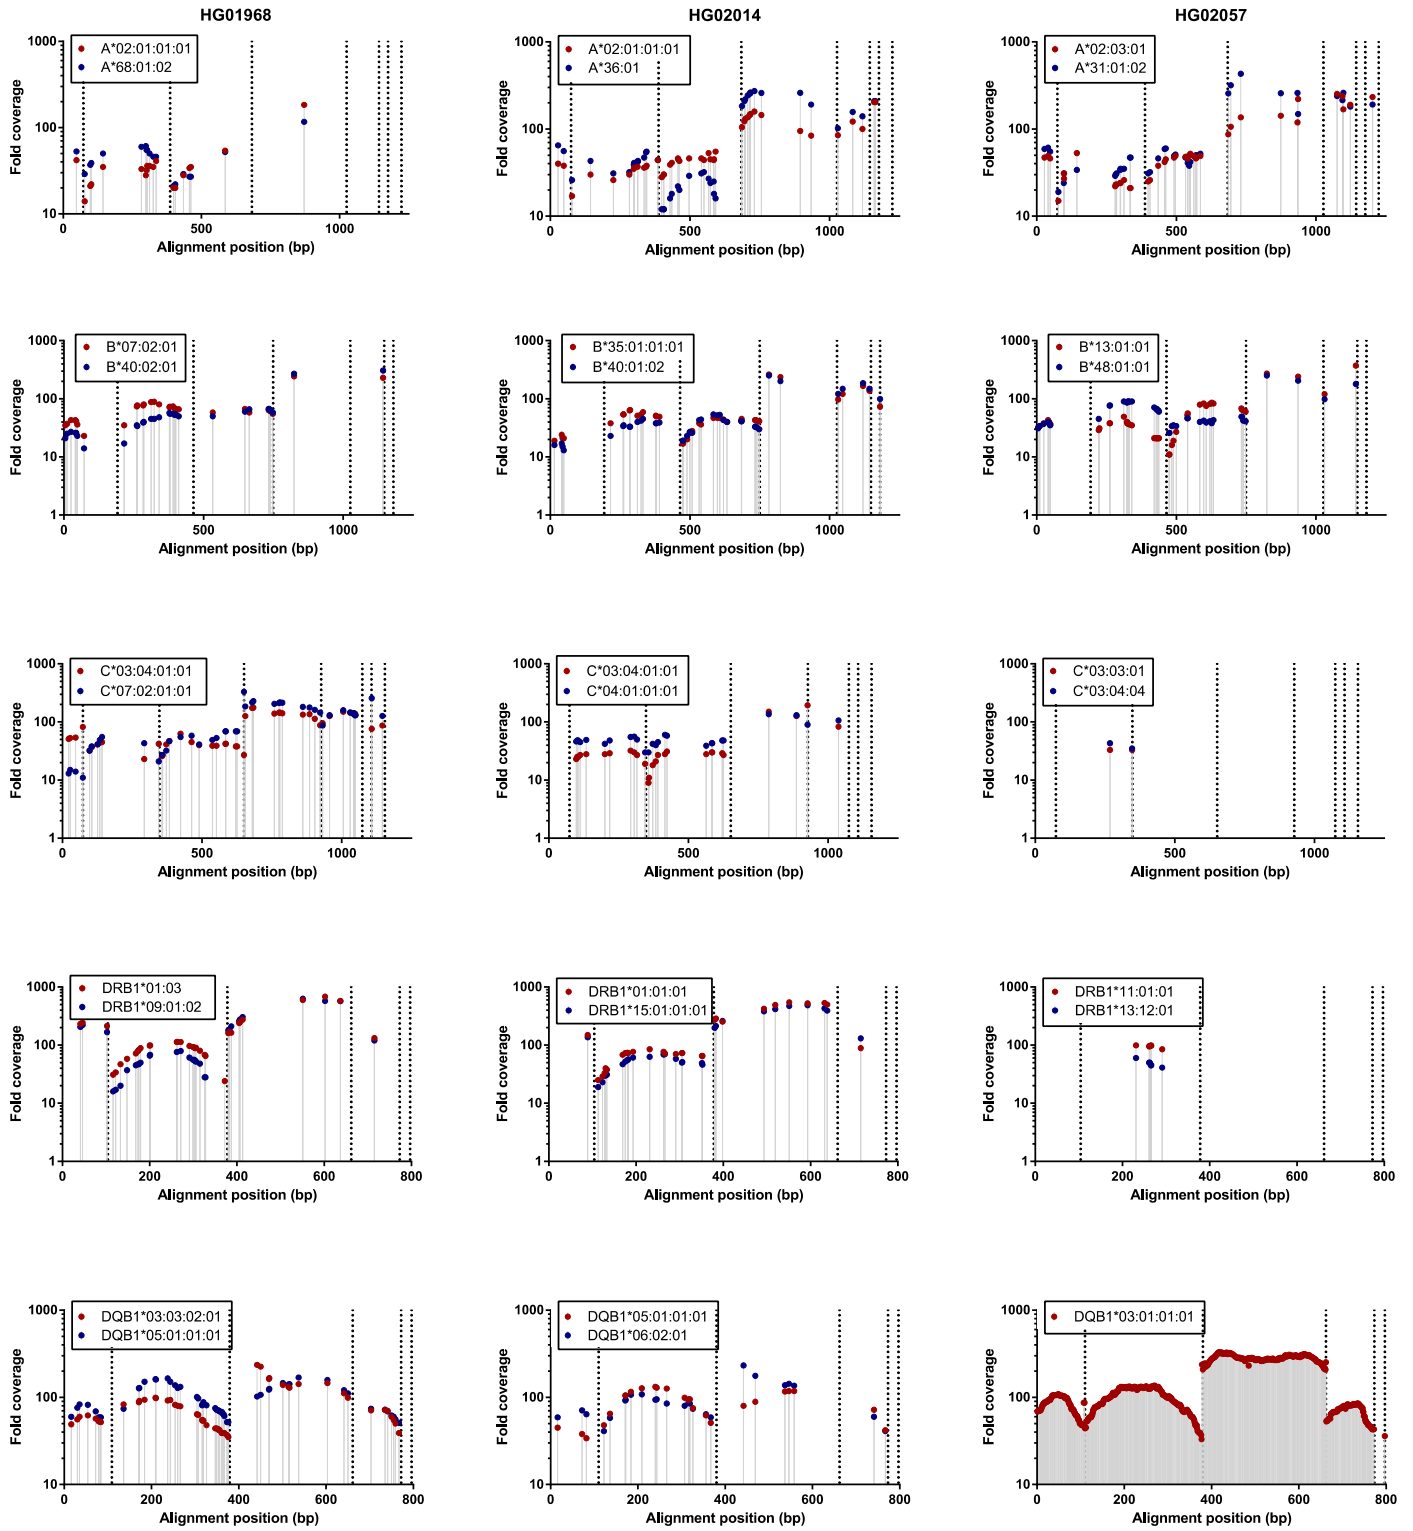

Supplementary Figure 8 (continued)

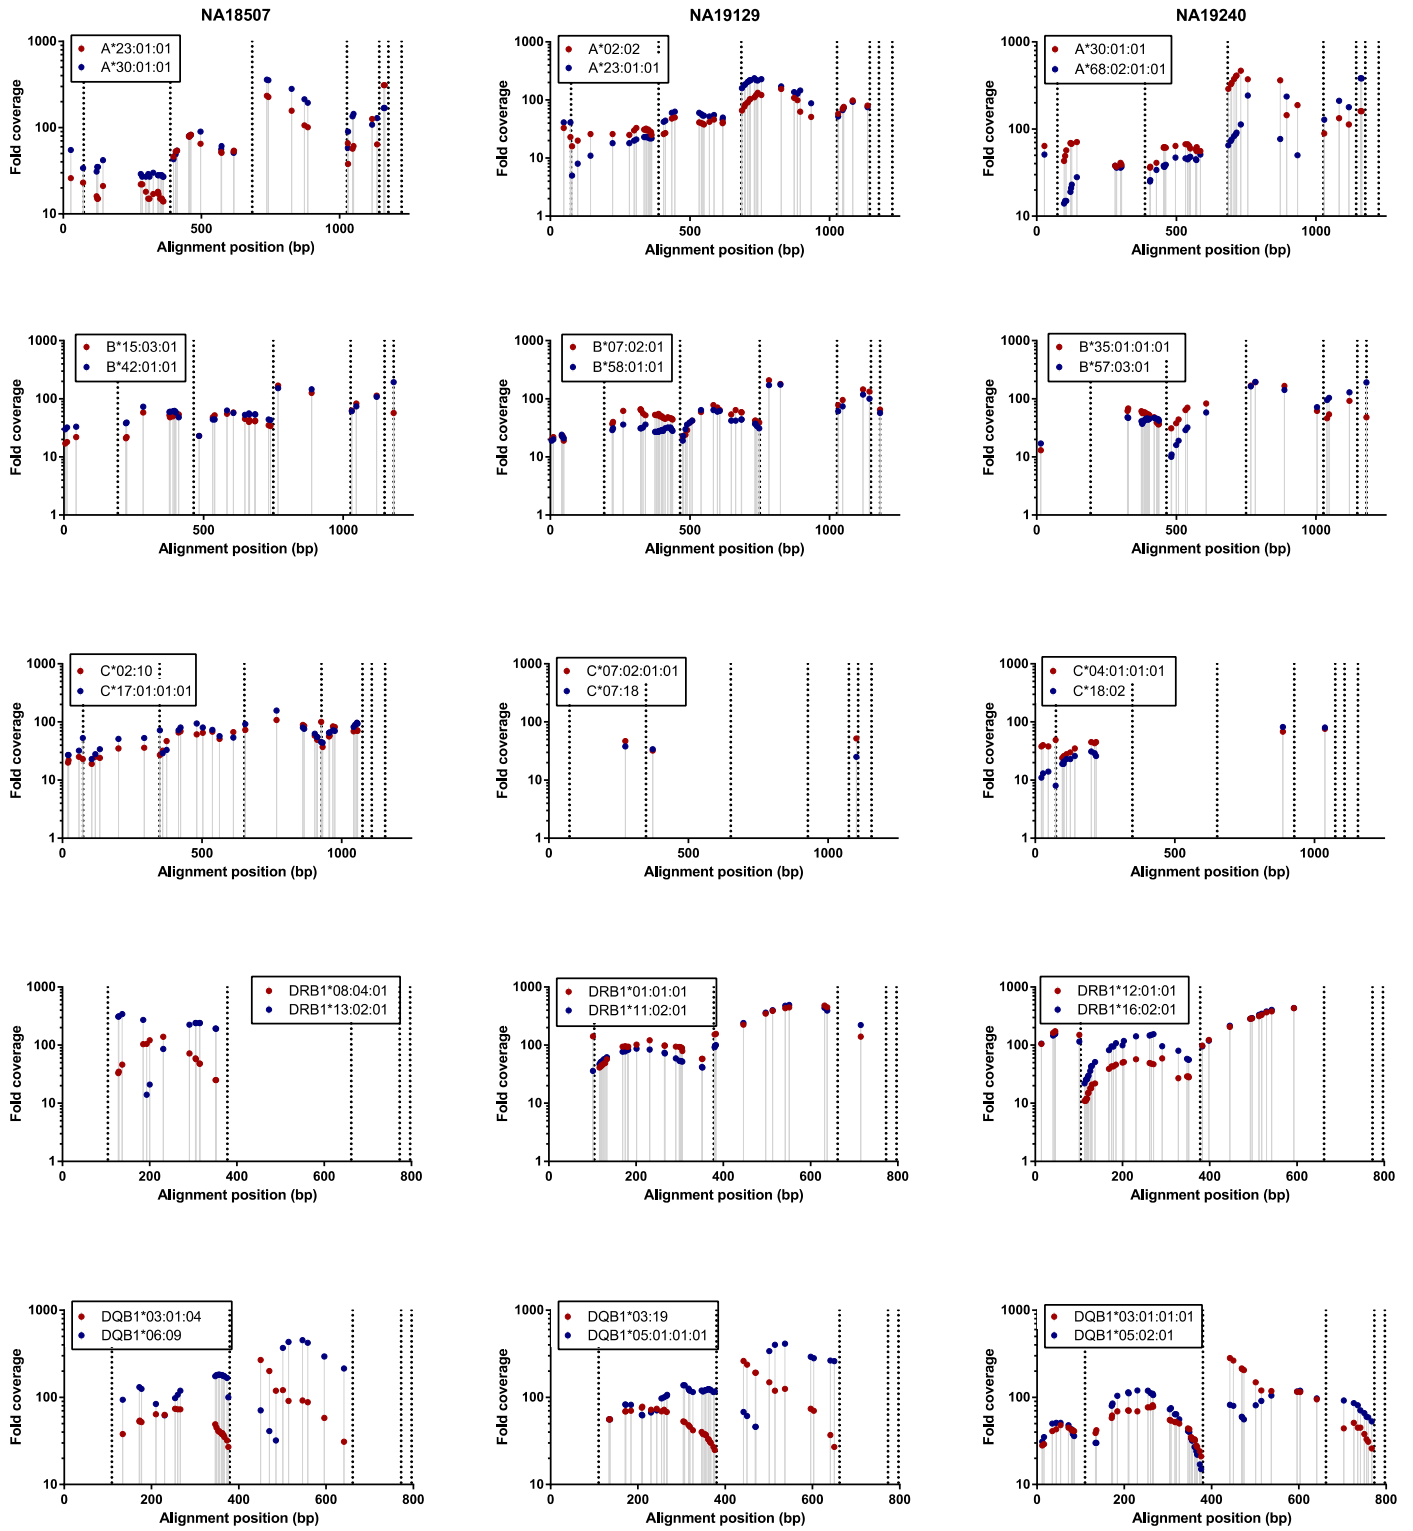

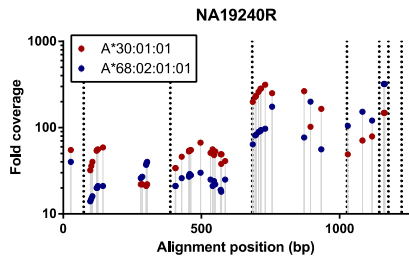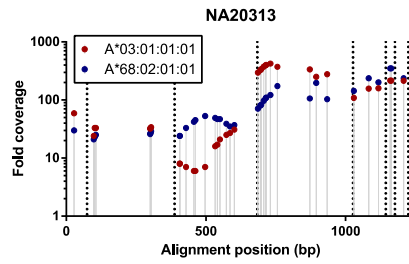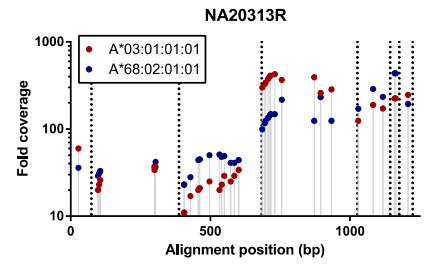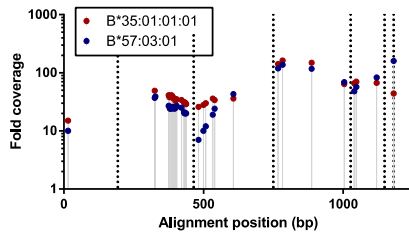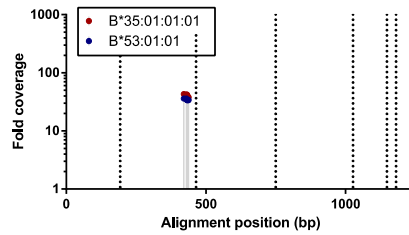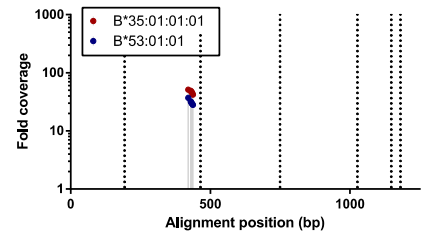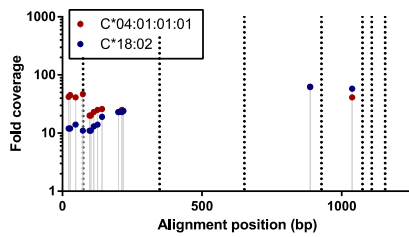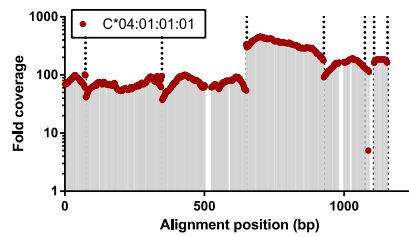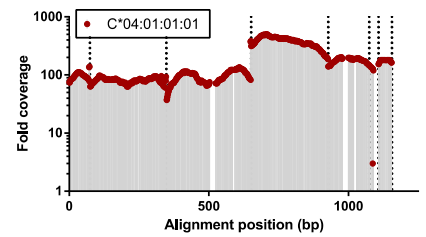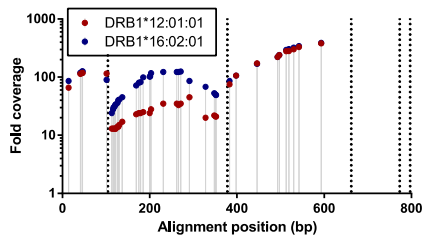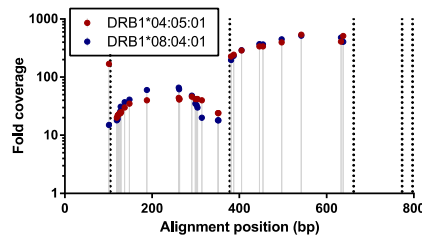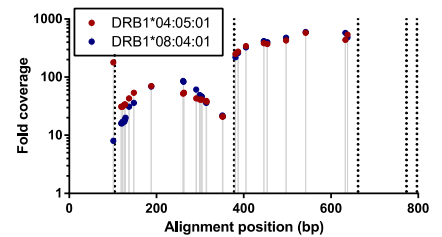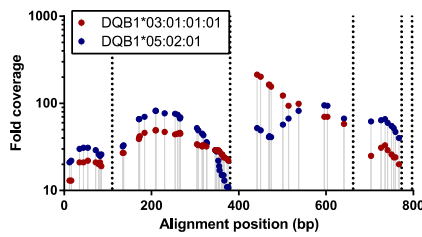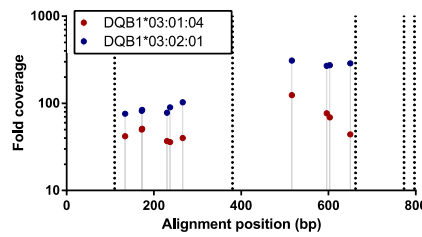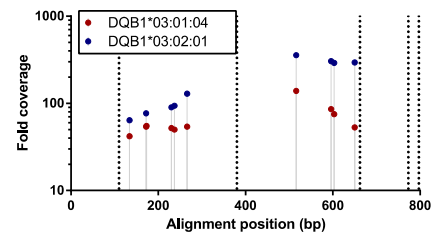

Difference in coverage as percentage of total (%)

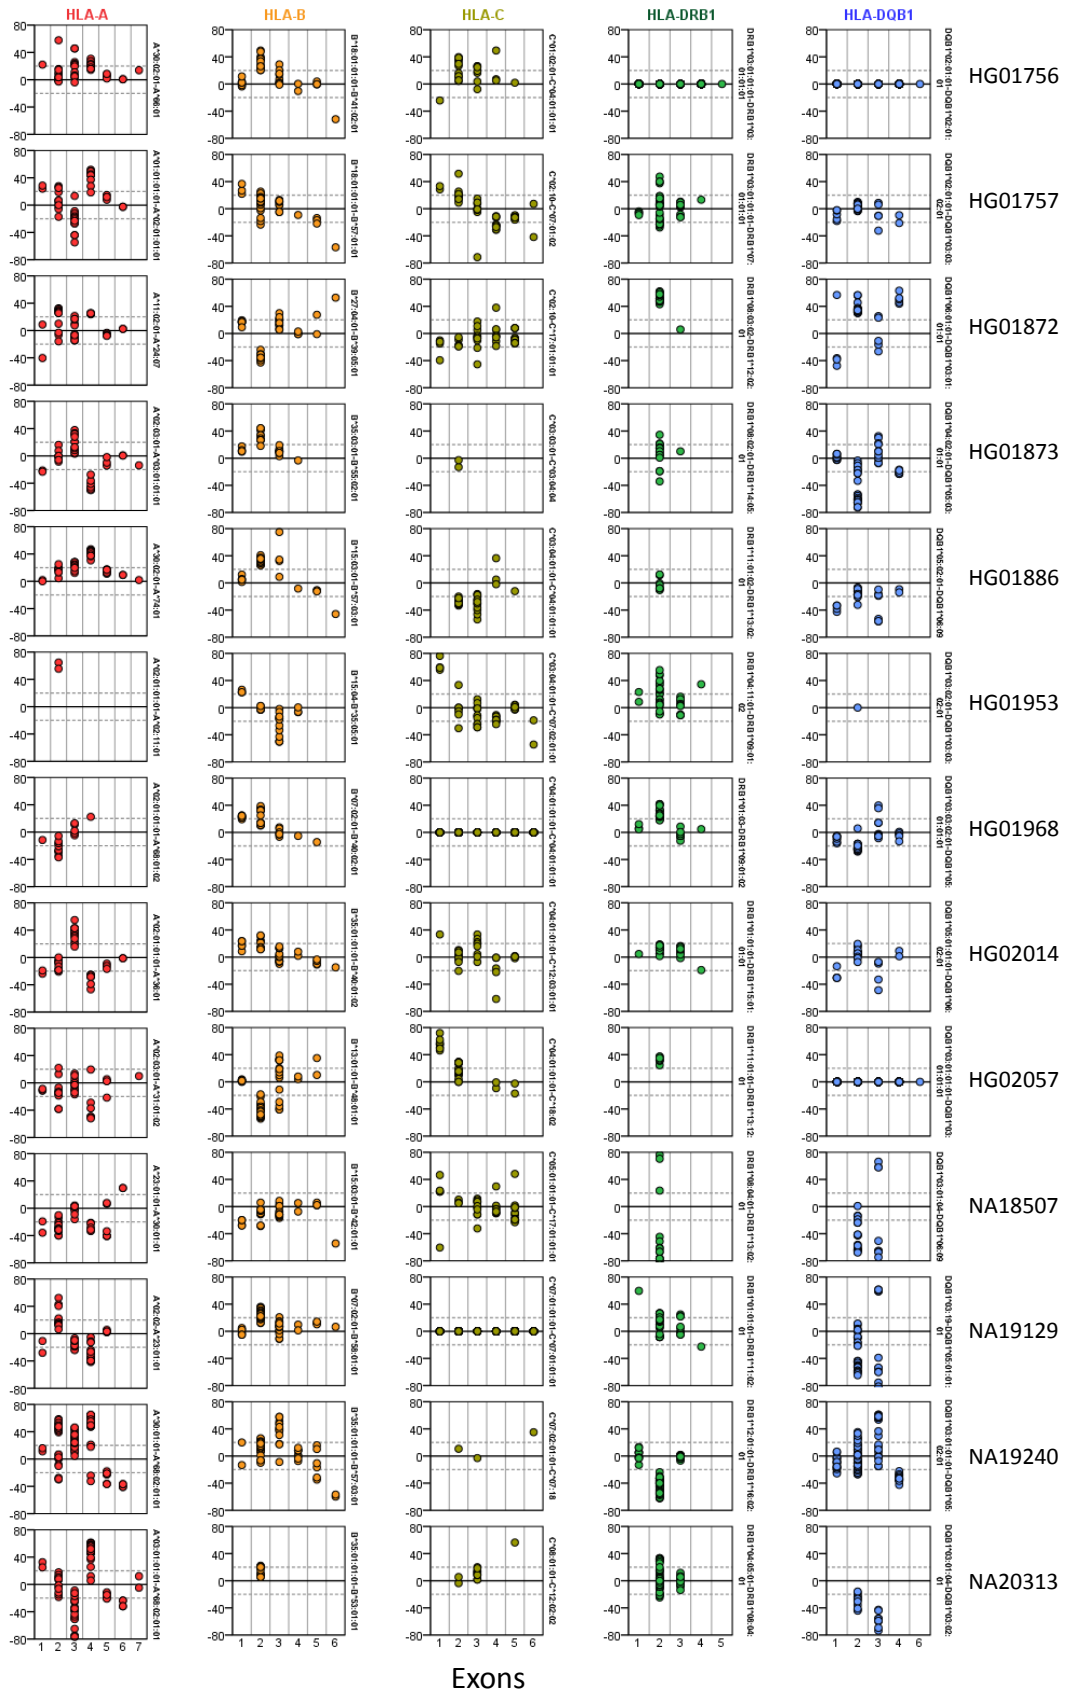

Supplement: supp_gkt481_nar-00605-met-k-2013-File004_update.pdf [file supp_gkt481_nar-00605-met-k-2013-File004_update.pdf]
